1 **An apicomplexan bromodomain, TgBDP1 associates with diverse epigenetic factors to**  
2 **regulate essential transcriptional processes in *Toxoplasma gondii*.**

3  
4 Krista Fleck, Seth McNutt, Feixia Chu, Victoria Jeffers\*

5 Molecular, Cellular and Biomedical Sciences, University of New Hampshire, Durham, NH.

6 \*Corresponding author [victoria.jeffers@unh.edu](mailto:victoria.jeffers@unh.edu)

7  
8 **Abstract**

9 The protozoan pathogen *Toxoplasma gondii* relies on tight regulation of gene expression to  
10 invade and establish infection in its host. The divergent gene regulatory mechanisms of  
11 *Toxoplasma* and related apicomplexan pathogens rely heavily on regulators of chromatin  
12 structure and histone modifications. The important contribution of histone acetylation for  
13 *Toxoplasma* in both acute and chronic infection has been demonstrated, where histone  
14 acetylation increases at active gene loci. However, the direct consequences of specific histone  
15 acetylation marks and the chromatin pathway that influences transcriptional regulation in  
16 response to the modification is unclear. As a reader of lysine acetylation, the bromodomain  
17 serves as a mediator between the acetylated histone and transcriptional regulators. Here we  
18 show that the bromodomain protein TgBDP1 which is conserved amongst Apicomplexa and  
19 within the Alveolata superphylum, is essential for *Toxoplasma* asexual proliferation. Using  
20 CUT&TAG we demonstrate that TgBDP1 is recruited to transcriptional start sites of a large  
21 proportion of parasite genes. Transcriptional profiling during TgBDP1 knockdown revealed that  
22 loss of TgBDP1 leads to major dysregulation of gene expression, implying multiple roles for  
23 TgBDP1 in both gene activation and repression. This is supported by interactome analysis of  
24 TgBDP1 demonstrating that TgBDP1 forms a core complex with two other bromodomain  
25 proteins and an ApiAP2 factor. This core complex appears to interact with other epigenetic  
26 factors such as nucleosome remodelling complexes. We conclude that TgBDP1 interacts with  
27 diverse epigenetic regulators to exert opposing influences on gene expression in the  
28 *Toxoplasma* tachyzoite.

29

30

31

32 **Summary**

33 Histone acetylation is critical for proper regulation of gene expression in the single celled  
34 eukaryotic pathogen *Toxoplasma gondii*. Bromodomain proteins are "readers" of histone  
35 acetylation and may link the modified chromatin to transcription factors. Here, we show that the  
36 bromodomain protein TgBDP1 is essential for parasite survival and that loss of TgBDP1  
37 results in global dysregulation of gene expression. TgBDP1 is recruited to the promoter region  
38 of a large proportion of parasite genes, forms a core complex with two other bromodomain  
39 proteins and interacts with different transcriptional regulatory complexes. We conclude that  
40 TgBDP1 is a key factor for sensing specific histone modifications to influence multiple facets of  
41 transcriptional regulation in *Toxoplasma gondii*.

42

## 43 Introduction

44 The protozoan *Toxoplasma gondii* is a ubiquitous parasite, infecting a third of the  
45 world's human population and vast numbers of livestock and wildlife in sensitive ecosystems.  
46 *Toxoplasma* is a member of the phylum *Apicomplexa*, that contains many important pathogens  
47 such as the intestinal parasite *Cryptosporidium*, and *Plasmodium* the causative agent of  
48 malaria. Infections by this group of intracellular parasites are notoriously difficult to treat or  
49 prevent due to their conserved eukaryotic cellular functions and their complex life cycles.

50 In addition to cell growth and maintenance, rapid molecular changes are required for  
51 *Toxoplasma* to transition between life cycle stages to support establishment and persistence of  
52 infection. Regulation of chromatin structure to support appropriate gene expression is vital,  
53 however these critical mechanisms in *Toxoplasma* are not fully understood (1,2). The  
54 additional and removal of post-translational modifications on histones and the importance of  
55 this dynamic in regulating transcription has become evident (1,3). Acetylation of lysine  
56 residues on histones plays a particularly important role in transcriptional activation (4–10).  
57 Similarly to observations in other eukaryotes, abolishing the function of *Toxoplasma* lysine  
58 acetyltransferases, or lysine deacetylases, the enzymes responsible for the addition or  
59 removal of acetyl groups on histones, perturbs gene expression and disrupts parasite  
60 proliferation and life cycle progression (9,11–13). These enzymes have been a focus of  
61 investigation for drug discovery, however a key player in the acetylation network, the  
62 bromodomain is relatively understudied. The bromodomain consists of an approximately 110  
63 amino acid sequence that forms an alpha helical bundle with a hydrophobic pocket that “reads”  
64 (recognizes and binds) the acetyl group on a lysine residue (14). Proteins containing  
65 bromodomains may perform multiple functions once bound to their intended targets, largely  
66 recruiting and interacting with other complexes to modify chromatin and regulate transcription.  
67 Due to their diverse and critical function, and their amenability to small-molecule inhibitors,  
68 bromodomains have become promising therapeutic targets in humans as treatments for  
69 cancer, immune and metabolic disorders (15).

70 A handful of bromodomain-containing proteins have recently been identified as key  
71 regulators of transcription and potential drug targets in Apicomplexans. In *Plasmodium*  
72 *falciparum* a complex consisting of bromodomain proteins PfBDP1, PfBDP2 and PfBDP7  
73 contributes to the expression of invasion factors (16,17) and in parallel, functions as a

74 repressor complex to maintain mutually exclusive expression of variant surface antigens  
75 (VSAs) (18). The bromodomain of a GCN5 homologue in *Toxoplasma* (TgGCN5b) was found  
76 to be important for parasite growth and a target of the bromodomain inhibitor L-Moses (11).  
77 Another bromodomain inhibitor, IBET-151 was also reported to inhibit *Toxoplasma* tachyzoite  
78 proliferation (19). Twelve predicted proteins with conserved bromodomains have been  
79 identified in the *Toxoplasma* genome, but six of these (TgBDP1-6) are unique to early  
80 branching eukaryotes (20,21). While these parasite-specific bromodomain proteins have  
81 excellent therapeutic potential, they have yet to be studied in *Toxoplasma* and their functions  
82 are unknown.

83 In the present study we sought to determine the role of the parasite-specific  
84 bromodomain protein TgBDP1 in *Toxoplasma* tachyzoites and validate its potential as a  
85 therapeutic target. Through sequence and structure analysis we confirmed TgBDP1 has a  
86 conserved bromodomain with homologues displaying a similar domain architecture only  
87 present in early branching alveolates. We generated a tetracycline-regulatable *tgbdp1*  
88 knockdown line and show that TgBDP1 is essential for progression through the parasite lytic  
89 cycle. We adapted and performed the Cleavage Under Targets & Tagmentation (CUT&Tag)  
90 technique for the first time in a protozoan, revealing that TgBDP1 is recruited to transcriptional  
91 start sites and performed co-immunoprecipitations to identify interacting proteins. Further  
92 supporting its role in transcription, knockdown resulted in substantial disruption to parasite  
93 gene expression. We conclude that TgBDP1 is an essential component of several key  
94 transcriptional regulatory complexes.

95

## 96 **Results**

### 97 **TgBDP1 is a bromodomain-containing protein conserved in apicomplexans.**

98 The *Toxoplasma* genome encodes twelve bromodomain-containing proteins, six of  
99 which (named TgBDP1-TgBDP6), have no homologues in mammals, plants, or fungi (20,21).  
100 TgBDP1 (TGME49\_263580) is predicted to be a 76 kDa protein containing a single  
101 bromodomain and a series of three ankyrin repeats (Fig. 1A). This domain architecture is only  
102 found in proteins from a subset of alveolates. BLAST analyses and conserved domain  
103 searches identified homologues in all Apicomplexan species examined but only a handful of  
104 other alveolates (Fig. 1B-C). The bromodomain is highly conserved and contains the

105 characteristic tyrosine (Y) and asparagine (N) residues necessary for domain binding to  
106 acetylated lysines (Fig. 1D) (22). The structure of the bromodomain of TgBDP1 was modelled  
107 using I-TASSER and compared to experimentally determined bromodomain structures (23).  
108 The predicted structure of TgBDP1 is highly similar to that of the bromodomain from the  
109 human protein BAZ2B, forming an alpha helical bundle and hydrophobic binding pocket in  
110 which the residues required for coordination of the target acetylated lysine are present and  
111 appropriately positioned (Fig. 1E). The crystal structure of the bromodomain of *Plasmodium*  
112 *falciparum* PfBDP1 has recently been determined (PDB: 7M97) (24) and closely matches that  
113 of the predicted structure of the bromodomain in TgBDP1. The conserved sequence and  
114 structure of the predicted TgBDP1 bromodomain suggests that TgBDP1 is a functional acetyl-  
115 lysine reader.

116

### 117 **TgBDP1 has an mRNA isoform.**

118 The predicted protein sequence of TgBDP1 contains 714 amino acids. However, intron  
119 predictions based on available RNA-sequencing data in the *Toxoplasma* genome database  
120 ToxoDB (25) predicted two possible sizes for the first exon (Supplemental Fig. 1A). The  
121 transcript with the longer exon matches the predicted mRNA sequence for *tgbdp1*, and the  
122 transcript containing the shorter exon produces an isoform with 63 fewer nucleotides,  
123 equivalent to a loss of 21 amino acids (Supplemental Fig. 1B). High resolution nanopore  
124 sequencing of *Toxoplasma* mRNAs conducted by Lee et al. also detected the two isoforms  
125 (Supplemental Fig. 1A) (26). To confirm these findings, we amplified and sequenced *tgbdp1*  
126 cDNA. Half of the clones sequenced (3/6) contained the shorter isoform, which we named  
127 *tgbdp1a* (Supplemental Fig. 1C). Additionally, our RNA-sequencing data from a separate line  
128 of experiments (described later) showed *tgbdp1* peak variations in all three replicates that  
129 would be consistent with a mixed population of the two mRNA isoforms (Supplemental Fig.  
130 1D). The TgBDP1 and TgBDP1a proteins are predicted to be 76 kDa and 74.5 kDa,  
131 respectively. However, this small difference in size cannot be distinguished by Western blotting  
132 of N-terminally or C-terminally tagged TgBDP1 (Fig. 2D, Fig. 4A). The remaining experiments  
133 outlined in this study are focused on TgBDP1 that was modified at the endogenous genomic  
134 locus, and thus TgBDP1 isoforms would presumably be processed and function as normal.  
135 Additional studies will be needed to determine if these two isoforms have distinct functions.

136

### 137 **Generation of TgBDP1 inducible knockdown**

138 A genome-wide CRISPR screen to evaluate essentiality of genes in *Toxoplasma*  
139 tachyzoites reported a low fitness score for *tgbdp1*, indicating that this gene could be essential  
140 (27). To determine the role of TgBDP1, we generated a transgenic, inducible knockdown line  
141 <sup>tet-myc</sup>TgBDP1 in which the endogenous *tgbdp1* promoter is replaced with a hybrid of the  
142 *Toxoplasma sag4* promoter and the tetracycline-responsive promoter, and a sequence  
143 encoding a triple myc tag is inserted at the 5'end of the gene (Fig. 2A). Correct genomic  
144 integration was confirmed by PCR (Fig. 2B), and nuclear localization of TgBDP1 protein was  
145 determined by immunofluorescence (IFA) (Fig. 2E). Treatment with anhydrotetracycline (ATc)  
146 to abolish transcription of *tgbdp1* results in a significant reduction of *tgbdp1* mRNA levels (Fig.  
147 2C). TgBDP1 protein also decreased over time as seen by Western blotting and IFA, falling  
148 below detectable levels by 36 hours (Fig. 2D-E).

149

### 150 **TgBDP1 is essential for the tachyzoite lytic cycle.**

151 Plaque assays were performed to evaluate parasite proliferation in the absence of  
152 TgBDP1. Tachyzoites of <sup>tet-myc</sup>TgBDP1 did not form plaques in the presence of ATc over six  
153 days, unlike the parental parasite line (TATi) that grew normally and formed plaques in the  
154 presence and absence of ATc (Fig. 4A). To determine the precise point in the parasite's lytic  
155 cycle that is inhibited, we tested the ability of parasites to invade and replicate within host cells.  
156 Parasites exposed to ATc for 36hrs displayed a three-fold reduction in their ability to invade  
157 cells (Fig. 4B). Defects in replication were seen as early as 12hrs post-invasion in the  
158 presence of ATc (Fig. 4C). By 36hrs parasites were significantly deformed and completely  
159 stalled in their replication. No defects in replication were observed when the parental line  
160 (TATi) was exposed to ATc (Supplemental Figure 2). These results demonstrate that loss of  
161 TgBDP1 severely impedes tachyzoite host cell invasion and replication, and TgBDP1 is  
162 essential for parasite proliferation.

163

### 164 **TgBDP1 functions as part of a parasite-specific core complex**

165 Bromodomain-containing proteins generally function as a component of a larger  
166 epigenetic regulatory complex. We sought to determine the function of TgBDP1 during

167 tachyzoite proliferation by identifying TgBDP1-interacting proteins. A transgenic parasite line  
168 was generated in which the C-terminus of TgBDP1 was tagged with a 3xHA epitope tag.  
169 Western blotting and IFA confirmed the correct protein size (81kDa) and nuclear localization of  
170 TgBDP1 (Fig 4A). This parasite line was used for co-immunoprecipitations (coIPs) followed by  
171 mass spectrometry of the pulldown to identify TgBDP1-associated proteins.

172 Peptide counts from three independent replicates were submitted to REPRINT  
173 (<https://reprint-apms.org/>) (28) for SAINT analysis to identify the most highly significant  
174 proteins that interact with TgBDP1 (Fig 4B). SAINT analysis evaluates total peptide counts  
175 between control and test samples and assigns a score (between 0 and 1) to each protein hit  
176 that describes the probability that a protein is a genuine interactor of TgBDP1. The most  
177 significant and abundant protein isolated alongside TgBDP1 with a SAINT score of 1, was the  
178 bromodomain protein TgBDP2 (Fig. 5B). Two other proteins were also assigned SAINT scores  
179 of 1, including the bromodomain-containing protein, TgBDP5, and the AP2 factor TgAP2Vlla-7  
180 that contains a PHD and a SET domain. In addition to this core network of factors, 10  
181 additional proteins with predicted nuclear localization were identified as potentially significant  
182 interactors (Fig. 4B, Supplemental Table 1), including predicted transcription factors, chromatin  
183 remodeling factors, RNA-associated proteins and enzymes involved in DNA, RNA and  
184 chromatin-related pathways (Fig 4B).

185 The significant enrichment, but low abundance and diverse function of these TgBDP1-  
186 bound proteins suggests that TgBDP1 functions as a component of multiple complexes  
187 involved in a variety of chromatin-related processes. These findings imply that TgBDP1  
188 interacts with TgBDP2, together with TgBDP5 and TgAP2Vlla-7 to function as part of multiple  
189 functional complexes.

## 190 191 **TgBDP1 is found at transcriptional start sites of active genes**

192 We next addressed the occupancy of TgBDP1 across the *Toxoplasma* genome by  
193 using Cleavage Under Targets & Tagmentation (CUT&Tag). This technique has several  
194 advantages over traditional ChIP-seq and has provided high quality results with human,  
195 mouse, and zebrafish cells (29). We adapted the technique for use with *Toxoplasma* parasites  
196 and used our transgenic TgBDP1<sup>HA</sup> line to determine TgBDP1 genome-wide localization.  
197 Briefly, an anti-HA antibody was used to target transposases harboring sequencing tags to

198 chromatin bound TgBDP1. The transposase then cleaved DNA on either side of the TgBDP1  
199 binding site, adding sequencing tags to the DNA ends. Tagged DNA fragments were amplified,  
200 sequenced, and mapped to the *Toxoplasma* genome. Our results were consistent between  
201 three independent replicates with little to no signal in the parental negative controls (Fig. 5A).  
202 To validate the CUT&Tag approach in *Toxoplasma*, we also performed the experiment with an  
203 antibody to acetylated lysine 9 on histone H3 (H3K9ac), a well-known active gene marker that  
204 is often found at transcription start sites (TSS). The distribution of H3K9ac observed by  
205 CUT&Tag was consistent with previous ChIP-chip studies (30). An average of approximately  
206 5,400 peaks for TgBDP1 binding sites were identified, the majority of which (63%) were  
207 located upstream of protein-coding genes (Fig. 5B-C). Only 39% of TgBDP1 peaks located at  
208 transcriptional start sites coincided with H3K9ac peaks (Fig. 5D). These results suggest that  
209 TgBDP1 may bind or coincide with H3K9ac, but not exclusively; it likely has roles independent  
210 of this particular acetyl mark. Our observation that TgBDP1 was bound upstream of open  
211 reading frames prompted us to compare TgBDP1 binding sites to predicted transcriptional start  
212 sites obtained from a recent study by Markus et al. (31). Of the 2,155 TgBDP1 peaks found  
213 within 2kb upstream of protein-coding genes, a large proportion (42%) align directly with  
214 transcriptional start sites (Fig. 5C-D, Supplemental Table 2).

215  
216 The expression profiles of TgBDP1 target genes were compared between tachyzoites  
217 and parasites undergoing bradyzoite differentiation. Using previously published transcriptomic  
218 data from Waldman et al. (32), we plotted the relative abundance of transcripts of TgBDP1-  
219 target genes during tachyzoite replication (X-axis) and early bradyzoite differentiation (Y-axis)  
220 (Fig 6A). Most TgBDP1-target genes are consistently expressed under both growth conditions  
221 (grey markers) suggesting that TgBDP1 is recruited to constitutively active genes. We also  
222 observed TgBDP1 binding to promoters of genes that are induced during bradyzoite formation  
223 (blue markers), suggesting that TgBDP1 may play a role in regulating chromatin structure to  
224 “poise” a gene for increased expression in response to environmental signals. However, a  
225 subset of TgBDP1-target genes are expressed at a low, or undetectable level in both  
226 tachyzoites and early bradyzoites (lower left side of the plot), demonstrating that TgBDP1  
227 binding within a gene promoter does not directly correlate with active or poised transcription  
228 and indeed, TgBDP1 may act as a repressor on these genes.



229

230 Gene Ontology (GO) enrichment analysis was performed on TgBDP1 target genes, to  
231 determine if it is a regulator of specific functional pathways. TgBDP1 was bound to the  
232 promoter of 24% of all annotated *Toxoplasma* genes so accordingly, functional enrichment  
233 analysis identified a diverse range of different biological process that may be subject to  
234 TgBDP1 regulation. Those pathways that were significantly enriched include transcription and  
235 mRNA splicing, ribosomal formation and protein maturation, and metabolic processes  
236 associated with the mitochondrion. Manual inspection of the list of TgBDP1 target genes also  
237 revealed many transcriptional regulators that may be subject to TgBDP1 regulation. Of the 85  
238 predicted transcription factors in the *Toxoplasma* genome, 33% were found to have TgBDP1 at  
239 their TSS, including 25 ApiAP2s and the myb regulator of bradyzoite formation, *tgbfd1* (Fig.  
240 6B) (32). Supporting our observation that *tgbdp1*-knockdown parasites were defective in host  
241 cell invasion, 105 genes encoding microneme, rhoptry and dense granule proteins are putative  
242 TgBDP1 targets.

243

244 TgBDP1 is recruited to many, but not all active genes in the tachyzoite, so we  
245 performed motif enrichment analysis of TgBDP1-target gene promoters to identify any specific  
246 DNA sequence motifs that may contribute to TgBDP1 recruitment. MEME-ChIP analysis of  
247 sequence 250bp up- and down-stream of the predicted TSS identified two DNA sequence  
248 features that were significantly enriched in target promoters (Fig 6C). The motif GCATGCA  
249 (motif 1) and a degenerate pyrimidine-rich sequence (motif 2) that is enriched downstream of  
250 the TSS of selected genes. Both of these motifs have previously been reported as  
251 characteristics of *Toxoplasma* TSSs (31,33–35).

252

### 253 **Loss of TgBDP1 impacts parasite transcription.**

254 Loss of TgBDP1 caused a defect in host cell invasion and an arrest in tachyzoite  
255 replication. As TgBDP1 appears to be a component of at least one epigenetic complex and is  
256 recruited to approximately 25% of predicted open reading frames, we investigated if the  
257 observed growth arrest during knockdown was due to global dysregulation of parasite  
258 transcription. Western blotting analysis of TgBDP1 during knockdown (Fig. 2D) indicates that  
259 TgBDP1 protein levels fall below 50% by 24hr and are almost undetectable by 36hr. To

260 determine the essential contribution of TgBDP1 to transcriptional regulation, we performed  
261 RNA-seq at 12, 24 and 36hr after addition of ATc. We observed a time dependent effect of  
262 *tgbdp1* knockdown on the parasite transcriptome with a small number of genes impacted at 12  
263 hours, but larger impacts observed at later time points (Fig. 7A). More than half of differentially  
264 expressed genes identified at 24hr were also dysregulated at 36hr (Fig. 7B). This observation,  
265 in addition to phenotypic data showing complete growth arrest at 36hr (Fig. 3), suggests that  
266 differentially expressed genes at 12 and 24hr likely represent more direct effects of *tgbdp1*  
267 knockdown, but by 36hr there are more indirect effects on parasite gene expression.  
268 Therefore, we focused our analyses on differentially expressed genes at the 12 and 24hr  
269 timepoints.

270 A small number of genes were significantly dysregulated by two-fold or more at 12hr.  
271 Most significant, was upregulation of *tgbdp2*, the gene encoding TgBDP2, the binding partner  
272 of TgBDP1 (Fig. 7C, Supplemental Table 3). Of the 48 significantly downregulated genes,  
273 TgBDP1 is recruited to the TSS of only four – ROP36 (TGME49\_207610), an aspartyl  
274 protease expressed in sporulated oocysts (TGME49\_272510) (36), a *Toxoplasma gondii*  
275 family D protein (TGME49\_313000) and a hypothetical protein (TGME49\_243700). Apart from  
276 *tgbdp1* itself, only one of the genes that are significantly downregulated has a phenotype score  
277  $< -1$  (TGME49\_211000), therefore downregulation of these genes is unlikely to contribute  
278 directly to parasite growth arrest. At this early timepoint in *tgbdp1* downregulation, there is very  
279 little impact on gene expression, aside from the significant upregulation of *tgbdp2* which is  
280 likely a compensatory response to loss of TgBDP1.

281 A more dramatic impact on parasite transcription was observed by 24hr post *tgbdp1*  
282 knockdown. A total of 550 genes were downregulated two-fold or more, only 118 of which are  
283 bound by TgBDP1 at their TSS (Fig. 7C, Supplemental Table 3). Gene Ontology (GO)  
284 Enrichment Analysis was performed on the lists of significantly dysregulated genes but did not  
285 identify any specific functional pathways that were enriched. Unexpectedly, a larger number of  
286 genes were upregulated in response to *tgbdp1* knockdown. Of the 675 upregulated genes, 140  
287 are also bound by TgBDP1 at the TSS. GO enrichment analysis of upregulated genes  
288 identified over four-fold ( $p=0.01$ ) enrichment of genes encoding surface proteins and invasion-  
289 related proteins from the SAG, microneme, dense granule and rhoptry families. Although 105  
290 invasion genes were identified by CUT&Tag to be associated with TgBDP1, only 19 of those

291 were upregulated. Therefore, the majority of dysregulated invasion genes are likely indirectly  
292 regulated by TgBDP1. These results suggest that loss of TgBDP1 influences the expression of  
293 other critical transcriptional activators or repressors; TgBDP1 is bound to the TSS of many  
294 putative transcription factors (Fig. 6B) and several transcription factors are dysregulated during  
295 *tgbdp1* knockdown (Fig. 7C).

296 The most consistent effect of *tgbdp1* knockdown is sustained upregulation of *tgbdp2*.  
297 This is the only gene identified at all three timepoints that was differentially expressed that also  
298 had TgBDP1 bound at the TSS, per CUT&Tag analysis (Fig. 7B). It remains unclear whether  
299 residual TgBDP1 is directly involved in upregulating *tgbdp2* expression or if loss of TgBDP1  
300 triggers an indirect compensatory response. Overall, the large number and functional diversity  
301 of both up- and down-regulated genes impacted during *tgbdp1* knockdown supports a global  
302 chromatin regulation function for TgBDP1, rather than merely a transcriptional activator.  
303 Furthermore, the subset of transcription factors that are directly and indirectly impacted by  
304 TgBDP1 points to this bromodomain and its complex(es) as key players of *Toxoplasma* gene  
305 expression.

306

## 307 **Discussion**

308 Histone acetylation is associated with activation of gene expression. Specific histone  
309 acetylation marks typical for gene activation, such as H3K9Ac and H4K8Ac, K12Ac and K16Ac  
310 are enriched at active gene promoters in *Toxoplasma* tachyzoites (8,10,30). In addition to  
311 altering chromatin structure to facilitate transcription, histone acetylation serves to recruit  
312 regulatory complexes to specific loci through the action of reader modules, such as  
313 bromodomains, although the precise function of most bromodomain-containing proteins in  
314 *Toxoplasma* gene regulation has yet to be determined. To understand the contribution of  
315 bromodomain proteins in *Toxoplasma* in mediating signals between histone acetylation marks  
316 and transcription initiation complexes, we investigated the role of a protein unique to alveolates  
317 and conserved within the Apicomplexa, TgBDP1. Based on reports on the *Plasmodium*  
318 *falciparum* BDP1 homologue (16,17), we initially hypothesized that TgBDP1 was a  
319 transcriptional activator that binds to activating acetylation marks on histone tails to recruit AP2  
320 proteins and other transcription factors to active gene promoters. This was supported by both  
321 our CUT&Tag and proteomic analysis that found TgBDP1 bound to chromatin at the predicted

322 TSS of many active genes in tachyzoites and associated with putative transcription factors and  
323 epigenetic regulators. However, analysis of global transcription revealed that more genes were  
324 upregulated than downregulated during ablation of TgBDP1, indicating a more complex role for  
325 this regulatory factor. Furthermore, we did not find a correlation between dysregulated genes  
326 and those that have TgBDP1 bound at the TSS, suggesting that much of the impact on gene  
327 expression that we observed is due to indirect effects of *tgbdp1* knockdown. TgBDP1 may  
328 influence transcription through regulation of transcriptional activators and repressors or via  
329 other, non-chromatin binding events, such as associating with acetylated transcription  
330 machinery.

331 Proteomic analysis of the TgBDP1 interactome supports multiple regulatory functions  
332 for the core TgBDP1/2/5 complex. We identified consistent association between the three  
333 bromodomain-containing proteins and the AP2 factor AP2Vlla-7, which contains a  
334 methyltransferase domain in addition to the AP2 domain. Our proteomic approach also  
335 detected transient interactions between TgBDP1 and three SWI/SNF nucleosome remodelers,  
336 implying a role for this complex in regulation of chromatin structure. Modulation of local  
337 chromatin structure can serve to both facilitate or repress transcription. TgBDP1 acting as a  
338 major regulator of chromatin structure would explain its apparent contrary influence on gene  
339 expression. We should also consider the presence of two isoforms of TgBDP1 (Fig S1) that  
340 may define different complex compositions and functionalities. Our analysis also detected an  
341 interaction between TgBDP1 and TgMORC, one of the major regulators of parasite stage-  
342 specific gene expression. TgMORC is required for recruitment of the HDAC3 repressor  
343 complex to maintain silencing of specific genes during the tachyzoite stage (37). The  
344 association of TgBDP1 with TgMORC hints at a role for TgBDP1 in gene silencing and may  
345 explain the large number of upregulated genes during *tgbdp1* knockdown (almost half of the  
346 genes (307 out of 676) upregulated during *tgbdp1* knockdown are TgMORC target genes), but  
347 further study of this interaction is necessary to understand the functional relevance to parasite  
348 transcriptional regulation. TgMORC transcript levels were also slightly increased during *tgbdp1*  
349 knockdown (1.56-fold) but were excluded by our cut offs. If this increase in TgMORC transcript  
350 levels results in functionally relevant increase in TgMORC protein, then this may additionally  
351 explain the downregulation of genes that do not have TgBDP1 bound at their TSS. Another  
352 interactor with the TgBDP1 core complex was TGGT1\_235420, a protein of unknown function

353 that localizes to the nucleus. Although the function of this protein is unknown, it is essential for  
354 tachyzoite survival in both *Toxoplasma* and the related coccidian *Neospora caninum* (38)

355 Many of the genes that are upregulated in response to *tgbdp1* knockdown are more  
356 highly expressed in bradyzoites or sexual stages compared to tachyzoites (Fig. S3). It is  
357 unclear if TgBDP1 is directly repressing expression of these genes, or if it indirectly represses  
358 stage-specific genes by regulating transcriptional factors required for maintenance of  
359 appropriate stage expression. Transcription factors dysregulated during *tgbdp1* knockdown  
360 include three AP2 factors that are significantly downregulated (AP2XI-1, AP2XII-2 and AP2XII-  
361 6). One of these, AP2XII-2 is a cell cycle-regulated protein associated with the  
362 TgMORC/HDAC3 repressor complex (37). Sustained AP2XII-2 expression may be required  
363 during tachyzoite growth to target the MORC complex to sexual or bradyzoite stage genes and  
364 maintain tachyzoite proliferation. Indeed, Srivastava and colleagues demonstrated that  
365 knockdown of AP2XII-2 results in slowed tachyzoite replication and increased cyst formation  
366 (39)(Srivastava 2022). We also observed significant upregulation of genes encoding three  
367 putative DNA binding proteins: two myb domain-containing proteins and the AP2 factor AP2IX-  
368 9. The functions of the two myb domain proteins are unknown, however they are both  
369 consistently expressed across all life cycles stages, suggesting that they may have  
370 housekeeping functions, and their upregulation may be a compensatory response to loss of  
371 TgBDP1. AP2IX-9 is a repressor of bradyzoite commitment, that is normally upregulated in  
372 response to bradyzoite induction conditions (39). TgBDP1 is bound to the TSS of AP2IX-9 in  
373 unstressed tachyzoites, so it is unclear how loss of TgBDP1 contributes to upregulation of  
374 AP2IX-9. There are a couple of possibilities for TgBDP1's influence on *ap2ix-9* expression;  
375 TgBDP1 maintains repression of *ap2ix-9* directly through its interactions with TgMORC and  
376 that loss of TgBDP1 derepresses *ap2ix-9*. Alternatively, TgBDP1 poises *ap2ix-9* for expression  
377 and upregulation of *ap2ix-9* is a direct response to the stress induced in the parasites by loss  
378 of TgBDP1. Another major regulator of parasite stage transition TgBFD1, which promotes  
379 upregulation of bradyzoite genes during the initial stages of differentiation into tissue cysts was  
380 also slightly upregulated (1.83-fold). However, since TgBFD1 appears to be primarily regulated  
381 at the translational level, and the protein that drives translation of TgBFD1, TgBFD2 (40) is not  
382 significantly increased during *tgbdp1* knockdown, it is unclear if this slight increase in *tgbfd1*  
383 transcript leads to increased protein levels.

384 One family of proteins upregulated during *tgbdp1* knockdown are the SRS family of  
385 surface proteins. This mirrors a recent report that evaluated gene expression patterns during  
386 knockdown of TgBDP5, a bromodomain protein that is also a component of the TgBDP1 core  
387 complex (42). Many of those upregulated during *tgbdp1* knockdown peak in expression level  
388 during sexual stages or the bradyzoite tissue cyst (41). A single cell RNA-seq analysis  
389 revealed that during normal tachyzoite growth, expression of many “stage-specific” SRS  
390 surface antigens is variable between individuals within a population of clonally derived  
391 parasites (43). Although the function of these surface proteins is unknown, the authors of these  
392 studies speculate that they may contribute to antigenic variation. In *P. falciparum*, many of the  
393 variable surface antigens *var*, *sica* and *rifin* were derepressed during knockdown of either the  
394 BDP1 (PfBDP1) or BDP5 (PfBDP7) homologues and there is strong evidence for a role of this  
395 protein complex in maintaining mutually exclusive expression of a single surface antigen by  
396 repressing other surface antigen genes (18). Although we did not observe TgBDP1 bound at  
397 all *srs* gene loci that were upregulated during *tgbdp1* knockdown, it remains an intriguing  
398 possibility that the TgBDP1/2/5 complex contributes to a form of antigenic variation or virulence  
399 factor regulation in *Toxoplasma* by mediating stage-specific repression of these surface  
400 proteins.

401 TgBDP1 is recruited to over a thousand specific sites in the parasite genome. A large  
402 proportion of bindings sites correlate with both predicted TSSs (31) and histone marks linked  
403 with transcriptional initiation, but it is unclear how the TgBDP1 complex is recruited to these  
404 target binding sites. Interactome analysis identified a total of three bromodomain-containing  
405 proteins and a putative DNA binding protein (AP2VIIa-7) in the core complex indicating that  
406 this recruitment is mediated by recognition of a DNA sequence motif and/or histone  
407 modifications. Our analysis of the sequences around TgBDP1 TSS binding sites identified two  
408 significantly enriched sequence features, one of which, the GCATGC motif, has been reported  
409 previously in *Toxoplasma* (31,33,34) as an enriched motif at TSSs in tachyzoites, so is unlikely  
410 to be a specific motif to recruit the TgBDP1 complex and rather a general feature of  
411 *Toxoplasma* gene promoters. It is likely that interactions between the three bromodomains in  
412 the complex, and histone acetyl marks are more important mediators of complex recruitment to  
413 the chromatin. Determining the histone marks that are preferentially bound by the TgBDP1  
414 bromodomain and the two interacting bromodomain-containing proteins TgBDP2 and TgBDP5

415 will be an important next step in understanding the function of this complex. We observed a  
416 strong correlation between TgBDP1 target sites and the histone H3K9Ac modification,  
417 suggesting that this may be one of the histone marks that is “read” by one or more of the  
418 bromodomains in the TgBDP1/2/5 complex. However, TgBDP1 was not located at every  
419 H3K9Ac enriched site indicating that another histone mark dictates TgBDP1/2/5 complex  
420 recruitment to the chromatin. The *P. falciparum* homologue, PfBDP1 did not display strong  
421 affinity for acetylated histone H3 peptide, even when multiple lysine residues were acetylated,  
422 suggesting that acetylated H3 is not important for complex recruitment. However, PfBDP1 has  
423 high binding affinity for acetylated histones H4, H2b.Z and H2a.z (24,44), particularly when  
424 multiple acetyl marks are present, suggesting that the PfBDP1/BDP2 complex is recruited to  
425 highly acetylated chromatin, rather than a specific acetylated histone residue. Additional  
426 studies will be needed to determine if this is also the case in *Toxoplasma*. Furthermore, it is  
427 probable that the ankyrin repeats of TgBDP1 mediate another important TgBDP1-protein  
428 interaction. The ankyrin repeats of the human methyltransferases G9a and G9a-like are reader  
429 modules of mono- and di-methylated H3K9 (45), so the ankyrin repeats of TgBDP1 may  
430 function in a similar manner to target the complex to modifications on chromatin. We also  
431 cannot discount the possibility that the bromodomain proteins may recognize a non-histone  
432 acetylated protein, of which many have been reported in *Toxoplasma* in previous studies (46–  
433 48). The regulatory implications of acetylation marks on non-histone proteins in the nucleus  
434 have not been investigated, but it is likely that this process contributes to another level of  
435 transcriptional regulation.

436 Several aspects of TgBDP1 biological function parallel that of the *P. falciparum*  
437 homologue PfBDP1, including interacting closely with additional bromodomain-containing  
438 proteins, binding at TSSs, and regulating gene expression (16,18). However, we identified key  
439 differences that suggest distinct roles between species. Knockdown of PfBDP1 negatively  
440 impacted parasite invasion but with no effect on replication or overall fitness. Whereas  
441 TgBDP1 knockdown resulted in major defects to replication and ultimately parasite death. We  
442 found that TgBDP1 associates with a larger cohort of epigenetic regulators compared to the  
443 PfBDP1 associated proteins and regulates a larger proportion, and more functionally diverse  
444 sets of genes, suggesting TgBDP1 has additional functions beyond those reported for the *P.*  
445 *falciparum* homologue.

446 We show that while TgBDP1 has a highly conserved bromodomain, it is otherwise  
447 divergent from human, yeast, and plant bromodomain proteins. Only apicomplexans and a  
448 small number of other alveolates possess a homologous protein. As this essential protein is  
449 highly conserved amongst the human pathogens within the phylum Apicomplexa, it serves as  
450 a promising candidate for drug development that warrants more in-depth study.

451

## 452 **Methods**

### 453 *Cell culture*

454 *Toxoplasma gondii* tachyzoites of RH $\Delta$ HX $\Delta$ Ku80 and TATi $\Delta$ Ku80 backgrounds  
455 (49,50) were maintained in human foreskin fibroblast (HFF) cells and Dulbecco's Modified  
456 Eagle Medium supplemented with 1% fetal bovine serum. Cells were cultured in a humidified  
457 incubator at 37°C with 5% CO<sub>2</sub>. <sup>tet-myc</sup>TgBDP1 and TgBDP1-HA cell lines were maintained in  
458 media containing 1 $\mu$ M pyrimethamine.

459

### 460 *TgBDP1 sequence analyses*

461 The predicted TGME49\_283580 (TgBDP1) genomic DNA, mRNA and protein  
462 sequences were obtained from ToxoDB (<https://toxodb.org>) (25). BLASTp analyses using the  
463 TgBDP1 predicted protein sequence were conducted in both the NCBI and VEuPathDB  
464 databases to identify homologues. Protein sequences from BDP1 homologues were aligned  
465 and evolutionary analysis performed using the maximum likelihood method in MEGA11 (51).  
466 Clustal Omega (EMBL-EBI) was used to align bromodomain sequences. The structure of  
467 TgBDP1's bromodomain was predicted using I-TASSER and overlaid with the experimentally  
468 determined structures of the human B2AZB bromodomain (PDB 5DYU) and the *Plasmodium*  
469 *falciparum* PfBDP1 bromodomain (PDB 7M97) using Chimera  
470 (<https://www.rbvi.ucsf.edu/chimerax>) (52). The ToxoDB genome browser, JBrowse, was used  
471 to visualize predicted introns and nanopore mRNA sequencing reads from the Lee et al.  
472 dataset (26). To confirm TgBDP1 mRNA transcript sequences, RNA was harvested from  
473 RH $\Delta$ HX $\Delta$ Ku80 parasites and cDNA synthesized using the Omniscript RT kit (Qiagen 205113)  
474 with *tgbdp1* specific primers 5'TTCAAAGATATGTCCACCCTCG and  
475 5'CCTTACATCAGCAGACCTGC. The resulting cDNA was used to amplify *tgbdp1* transcripts  
476 with primers 5'AGTGAATTTCGAGCTCGGTACCATGTCTCGACTGGCGCGAGTG and



477 5'TGCATGCCTGCAGGTCGACTCTAGATTAAGCTCCACGTGATTCTCCG which were then  
478 cloned into a pUC19 vector. Plasmid DNA was isolated from six different bacterial clones and  
479 sequenced.

480

#### 481 *Generation of TgBDP1 knockdown (<sup>tet-myc</sup>TgBDP1)*

482 Inducible knockdown of the *tgbdp1* gene was accomplished by replacing the  
483 endogenous *tgbdp1* promoter with a tetracycline regulatable *tgsag4* promoter and adding a  
484 3xmyc tag to the 5' end of the *tgbdp1* gene. A 2,100bp region of genomic DNA directly  
485 downstream of the *tgbdp1* start codon was amplified with primers  
486 5'catctccgaggaggacctgagatctTCGACTGGCGCGAGTGTG and  
487 5'TACGATGCGGCCGCcgatacatctgggcttgcc from TATiΔKu80 genomic DNA. The DHFR-  
488 tet07Sag4-3xMyc-CEP250 plasmid (kindly provided by MJ Gubbels) was digested with BglII  
489 and NotI, and the HiFi DNA Assembly kit (NEB E5520S) was used to insert the *tgbdp1*  
490 fragment. The final DHFR-tet07Sag4-3xMyc-tgbdp1 plasmid was verified by sequencing. One  
491 hundred micrograms of plasmid was linearized with NotI and transfected into TATiΔKu80  
492 (TATi) parasites (kindly provided by MJ Gubbels) by electroporation in cytomix (53). Parasites  
493 were cultured with 1uM pyrimethamine for selection and cloned by limiting dilution. PCR of  
494 genomic DNA with primers P1 5'GCTAATCTCCGAGGAAGACTTG and P2  
495 5'TGGCCTGCTCTCGTTTTCAC was used to confirm correct integration. PCR with primers P2  
496 5'CGATTGCCTCTCCCTCAAGTCC and P3 5'TCTCGACCTCTTCGCGTACG confirmed  
497 disruption of the endogenous promoter.

498

#### 499 *Generation of endogenously tagged TgBDP1 (TgBDP1<sup>3xHA</sup>)*

500 A 3xHA epitope tag was introduced at the 3' end of the endogenous *tgbdp1* gene. A  
501 2,131bp region of genomic DNA upstream of the *tgbdp1* stop codon was amplified with primers  
502 5' tactccaatccaatttaattaaTGAGCAAGTGAGGCAAGC and  
503 5'cctccactccaatttaattaaAGCTCCACGTGATTCTCC and inserted using the HiFi DNA  
504 assembly kit into pLIC-3xHA-DHFR cut with PacI. The final pLIC-TgBDP1-3xHA-DHFR  
505 plasmid was verified by sequencing. One hundred micrograms of plasmid was linearized with  
506 AflIII and transfected into RHΔHXΔKu80 (ΔKu80) parasites by electroporation in cytomix.  
507 Parasites were cultured with 1uM pyrimethamine for selection and cloned by limiting dilution.

508

### 509 *Immunofluorescence Assays*

510 Parasites were inoculated into 24-well plates of confluent HFFs containing coverslips  
511 and cultured approximately 24hrs (+/- ATc), then fixed with 4% paraformaldehyde and  
512 permeabilized with Triton X-100 in 3% BSA. Samples were blocked in 3% BSA and primary  
513 and secondary antibodies diluted in 3% BSA. Primary antibodies anti-myc (Invitrogen 132500)  
514 and anti-HA (Roche 27573500) were diluted 1:2000 and secondary antibodies anti-mouse  
515 Alexa Fluor 594 (Thermo Fisher Scientific A11005) and anti-rat Alexa Fluor 594 (Thermo  
516 Fisher Scientific A11007) were diluted 1:5000. After antibody incubations, samples were  
517 incubated with DAPI (Invitrogen D1306) in 3% BSA and coverslips mounted to slides with  
518 Vectashield mounting medium (Vector Laboratories H1000). Slides were visualized and  
519 imaged with a Nikon A1R laser scanning Confocal Fluorescence Microscope and NIS-  
520 Elements software.

521

### 522 *Western blotting*

523 Protein was isolated from parasites by resuspending harvested parasites in RIPA buffer  
524 supplemented with protease inhibitor cocktail (Research Products International Corp  
525 P506001). Samples were then sonicated using a QSonica Q800R3 at 50% amplitude for 2  
526 minutes. Insoluble material was pelleted and removed. Protein concentrations of lysates were  
527 determined using a BCA kit (Thermo Fisher Scientific 23227) and 50ug of protein was used for  
528 Western blotting. Protein samples were separated by SDS-PAGE in 4-15% Bis-Tris gels with  
529 MOPS buffer and transferred to nitrocellulose membrane. Membranes were blocked in 5%  
530 non-fat milk and incubated in primary and secondary antibodies diluted in 5% non-fat milk. The  
531 following antibodies were used: anti-myc-HRP (Santa Cruz sc-40) diluted 1:100, anti-HA  
532 (Roche 27573500) diluted 1:2000, anti-rat-HRP (GE NA935) diluted 1:2000, anti-p30 (SAG1)  
533 (Invitrogen MA183499) diluted 1:2000 and anti-mouse-HRP (GE NA931) diluted 1:2000.  
534 Pierce ECL detection reagent (Thermo Fisher Scientific 32109) and a BioRadV3 Chemidoc  
535 Imager were used to visualize blots.

536

### 537 *Quantitative RT-PCR*

538 Total RNA was harvested from <sup>tet-myc</sup>TgBDP1 parasites 36hrs post-inoculation and that  
539 had been cultured +/- ATc 1uM ATc for 12, 24 or 36 hours. Parasites were pelleted and  
540 resuspended in 1ml TRI Reagent (MilliporeSigma T9424). RNA was isolated by  
541 phenol:chloroform extraction and isopropanol precipitation followed by genomic DNA removal  
542 using the Turbo DNA-free kit (Invitrogen AM1907). Three micrograms of RNA were used to  
543 synthesize cDNA with the Omniscript RT kit using oligo dT primers (Qiagen 205113). Resulting  
544 cDNA was diluted 1:2 and used for real-time PCR with Power SYBR Green (Thermo Fisher  
545 Scientific 4367659) and Applied Biosystems 7500 real time PCR system. *tgbdp1* was amplified  
546 with primers 5'CACATCCTCAGCAATTCCTTAAG and 5'GCGAGGACACTGTAGATCTTG,  
547 and *tgtuba1* (used for normalization) was amplified with primers  
548 5'GATGCCCTCTGACAAGACC and 5'CATCCTCTTTCCCGCTGATC. The delta delta Ct  
549 method was used to quantify changes in gene expression compared to -ATc samples and 2<sup>-</sup>  
550 ddct was used to calculate fold change. Data from three independent replicates was  
551 statistically analyzed using one-way ANOVA and Dunnett's multiple comparisons test in  
552 GraphPad Prism Version 9.3.1 for MacOS, GraphPad Software, San Diego, California USA,  
553 [www.graphpad.com](http://www.graphpad.com).

554

### 555 *Toxoplasma growth assays*

556 Plaque assays were done to assess the effect of TgBDP1 knockdown on *Toxoplasma*  
557 growth as previously described (53). Briefly, 200 parasites of the <sup>tet-myc</sup>TgBDP1 and parental  
558 (TATi) parasite lines were inoculated into 12-well plates of confluent HFFs in media +/- ATc  
559 and cultured for six days. Cells were then fixed in methanol, stained with crystal violet, and  
560 imaged with an Invitrogen EVOS M7000 microscope. The area of the plaques per well (area of  
561 host cell lysis) was quantified from the images using ImageJ software and percentage of host  
562 cell lysis compared to -ATc calculated. An unpaired t-test from three independent experiments  
563 was performed using GraphPad Prism.

564 *Toxoplasma* red/green invasion assays were performed as previously described (54). <sup>tet-</sup>  
565 <sup>myc</sup>TgBDP1 and TATi parasites were cultured +/- ATc for 36hrs, at which point intracellular  
566 parasites were harvested and counted. Parasites and 12-well plates of HFFs containing  
567 coverslips were chilled on ice and 1x10<sup>6</sup> parasites inoculated per well, remaining on ice for  
568 15min. The inoculated plate was then incubated in a 37°C water bath for 1min before moving

569 to the 37°C incubator. Plates were incubated for 2hr, then washed to remove extracellular  
570 parasites. Cells were fixed with 3% paraformaldehyde, blocked with 3% BSA and incubated  
571 with 1:1000 dilution of mouse anti-P30 (SAG1) primary antibody (Invitrogen MA183499). Cells  
572 were then permeabilized and incubated with 1:1000 dilution of rabbit anti-Toxoplasma primary  
573 antibody (Invitrogen PA17252) followed by a final incubation with secondary antibodies goat  
574 anti-mouse Alexa Fluor 488 (1:5000) (Thermo Fisher Scientific A11001) and goat anti-rabbit  
575 Alexa Fluor 594 (1:5000) (Thermo Fisher Scientific A11012). A Zeiss Axioplan 2 fluorescent  
576 microscope was used to visualize over 1000 parasites per treatment group. Red only parasites  
577 were designated intracellular while dual color parasites (red and green) were considered  
578 extracellular. The percentage of intracellular parasites was calculated and an unpaired t-test  
579 between -ATc and +ATc groups for three independent experiments performed.

580 Doubling, or replication, assays were used to determine *Toxoplasma* replication rate. <sup>tet</sup>-  
581 <sup>myc</sup>TgBDP1 and TATi parasites were cultured +/- ATc for 24hrs, at which point intracellular  
582 parasites were harvested and inoculated into a 12-well plate of confluent HFFs in media +/-  
583 ATc. Two hours post-inoculation media and extracellular parasites were removed and fresh  
584 media +/- ATc added. Wells were fixed with Hema3 fixative 12, 24 and 36hrs post-inoculation  
585 and then stained with Hema3 Staining Solutions I and II. The number of parasites per vacuole  
586 was counted for 100 vacuoles. Three independent experiments were conducted.

587

### 588 *Co-immunoprecipitation*

589 ColPs and mass spectrometry were used to identify TgBDP1-interacting proteins in  
590 TgBDP1-HA parasites, with  $\Delta$ Ku80 parasites used as a negative control. For each sample,  
591 parasites were cultured for 36hrs and 8 T-150s of intracellular parasites harvested. Nuclei  
592 were harvested by resuspending cells in 1ml lysis buffer A [10mM KCl, 10mM HEPES pH 7.4,  
593 0.1% NP-40, 10% glycerol, cOmplete protease inhibitor cocktail (Roche 04693159001)],  
594 incubated on ice 5min then pelleted at 10,000xg for 10min at 4°C. The nuclei pellet was  
595 resuspended in 500ul lysis buffer B (400mM KCl, 10mM HEPES pH 7.4, 0.1% NP-40, 10%  
596 glycerol, cOmplete protease inhibitor cocktail), vortexed for 30min at 4°C and centrifuged at  
597 10,000xg for 10min at 4°C. For each 500ul nuclear supernatant, 50ul of pre-washed anti-HA  
598 magnetic beads (Thermo Fisher Scientific 88837) was added and samples rocked at 4°C  
599 overnight. Protein-bound anti-HA magnetic beads were washed five times in colP buffer

600 (0.025M Tris, 0.15M NaCl, 0.001M EDTA, 1% NP-40, 5% glycerol, cOmplete protease inhibitor  
601 cocktail) then resuspended in 45ul 2x LDS buffer and 8% beta-mercaptoethanol and boiled  
602 10min. Samples were run on a 4-12% Bis-Tis gel in MOPS buffer and the gel stained with  
603 Coomassie G-250 for 1.5hrs.

604 Protein samples were recovered by isolating gel bands that were then processed via in-  
605 gel digestion and analyzed by LC-MS and LC-MS-MS as described previously (55). Briefly, a 1  
606 ul aliquot of the digestion mixtures was injected into a Dionex Ultimate 3000 RSLCnano  
607 UHPLC system with an autosampler (Dionex Corporation, Sunnyvale, CA, USA), where it was  
608 then separated in a 100  $\mu\text{m}$  x 15 cm capillary packed with Dr. Maisch ReproSil-Pur C18-AQ,  
609 r13.aq (120  $\text{\AA}$ ; 3  $\mu\text{m}$ ), at a flow rate of  $\sim$ 450 nl/min. The eluant was connected directly to a  
610 nanoelectrospray ionization source of an LTQ Orbitrap XL mass spectrometer (ThermoFisher  
611 Scientific). LC-MS data were acquired in a data-dependent acquisition mode, cycling between  
612 a MS scan ( $m/z$  315-2000) acquired in the Orbitrap, followed by collision-induced dissociation  
613 analysis on the three most intensely multiply charged precursors acquired in the linear ion trap.  
614 The LC-MS/MS data was processed by PAVA bioinformatic program to generate the  
615 centroided peak lists of the CID spectra and searched against a database that consisted of the  
616 Swiss-Prot protein database (version 2021.06.18; 53/565,254 entries searched for  
617 *Toxoplasma Gondii*), using the Batch-Tag program module of the Protein Prospector  
618 bioinformatic package from the University of California, San Francisco (version 6.3.1). A  
619 precursor mass tolerance of 20 ppm and a fragment mass tolerance of 0.6 Da were used for  
620 protein database search (trypsin as enzyme; one missed cleavage; carbamidomethyl [C] as  
621 constant modification; acetyl [protein N-term], acetyl + oxidation [protein N-term M], Gln -  
622 >pyro-Glu [N-term Q], Met-loss [protein N-term M], Met-loss +acetyl [protein N-term M],  
623 oxidation [M] as variable modifications). Protein matches were reported with a Protein  
624 Prospector protein score  $\geq$ 22, a protein discriminant score  $\geq$ 0.0, and a peptide expectation  
625 value  $\leq$ 0.01 (56). Data are available via ProteomeXchange with identifier PXD038848.  
626 Potential TgBDP1-associated proteins were identified as those with peptide counts at least 2-  
627 fold higher in TgBDP1-HA samples compared to  $\Delta$ Ku80, present in at least 2 out of 3  
628 independent experiments and with a predicted or verified nuclear localization. SAINT analysis  
629 was performed using REPRINT (<https://reprint-apms.org/>) with default settings (28).

630

631 *Cleavage Under Targets & Tagmentation (CUT&Tag)*

632 CUT&Tag was used to identify the genomic localization of TgBDP1<sup>3xHA</sup>. Based on  
633 protocols and findings from the Henikoff lab (29), we modified the technique for use with  
634 *Toxoplasma* tachyzoites. For each sample, intracellular parasites cultured for 36hrs were  
635 harvested from 1 T-75, syringe lysed, filtered through a 3um filter and counted. Ten million  
636 ( $1 \times 10^7$ ) parasites were centrifuged 2000xg for 10min and the parasite pellet used directly with  
637 the CUT&Tag-IT Assay Kit (Active Motif 53160). Our experimental sample used TgBDP1<sup>3xHA</sup>  
638 parasites and 1ul of a 1:50 dilution of the rabbit anti-HA primary antibody (Cell Signaling  
639 3724T). The negative control sample used  $\Delta$ Ku80 parasites (the parental line) with the same  
640 primary antibody conditions. Samples were incubated with primary antibody overnight at 4°C.  
641 The remainder of the kit protocol was followed exactly, and unique indexed primers were used  
642 for each sample. Three biological replicates were done for both TgBDP1<sup>3xHA</sup> and  $\Delta$ Ku80  
643 parasites. Due to small cell number and low amount of input DNA needed for this technique,  
644 negative controls often result in very little to no DNA and are therefore not able to be  
645 sequenced. This was the case for one or our three negative control replicates. A single positive  
646 control sample was processed in parallel to confirm that our technique was successful. We  
647 used an anti-H3K9ac antibody (Active Motif 39917) with TgBDP1<sup>3xHA</sup> parasites to identify the  
648 highly abundant H3K9ac mark throughout the *Toxoplasma* genome, which has previously  
649 been done using CHIP-chip (30).

650 Indexed libraries for each sample were analyzed by TapeStation, pooled and run on  
651 NextSeq 500/550 High Output (75 cycles) flow cell to generate paired end reads.  
652 Demultiplexing of the reads was performed with bcl2fastq version 2.20.0 and processed with  
653 cutadapt v3.4 (57) to filter sequencing adapters from the 3' end of reads, and any reads with  
654 fewer than 30 base pairs were removed. Remaining reads were mapped to version 52 of the  
655 *Toxoplasma gondii* ME49 reference downloaded from ToxoDB (25). The mapping was  
656 performed with HISAT2 v 2.2.1 (58) using the following parameters "--no-discordant--no-  
657 spliced-alignment --phred33 --no-unal --nomixed". Unmapped reads were removed with  
658 samtools 1.9 (59). For each sample, peaks were then called using the callpeak command  
659 within MACS3 3.0.0a6 (60), with the parameters "-g 6.e7 -B -q 0.01". A custom python script  
660 was used to associate predicted peaks with genes defined in version 52 of the ME49 reference  
661 and Transcription Start Sites identified in *Toxoplasma gondii* (31). A heatmap of mapped reads

662 in relation to these TSS's was generated using the computeMatrix and plotHeatmap  
663 commands from deepTools version  
664 3.5.0 (61). DNA motif analysis was performed using MEME-ChIP (62) with default settings and  
665 sequences 250bp upstream and downstream of TSS with TgBDP1 associated peaks.

666

#### 667 *RNA-sequencing (RNA-seq)*

668 <sup>tet-myc</sup>TgBDP1 parasites were cultured 36hrs and treated -ATc or +ATc for 12, 24 or  
669 36hrs. Intracellular parasites were harvested from 2 T-150s for each sample, syringe lysed,  
670 filtered through a 3um filter and pelleted. The Qiagen RNease Plus Mini Kit was used to isolate  
671 RNA per the manufacturer's instructions. Library preparation was completed with the KAPA  
672 mRNA HyperPrep Kit (Illumina® Platforms). Sequencing was completed at the Hubbard  
673 Center for Genome Studies on an Illumina NovaSeq 6000 platform to produce 250bp paired-  
674 end reads. Raw sequencing data was demultiplexed using bcl2fastq v1.8.4 (Illumina). Read  
675 quality was examined with FASTQC v0.11.9. Adapters and low-quality sequences were  
676 trimmed from the reads using Trimmomatic V0.32 (63) with default setting. The *Toxoplasma*  
677 reference genome and annotations (ME49) were downloaded from ToxoDB (release 56), and  
678 datasets were mapped to the reference genome using HISAT2 (58) with default setting. The  
679 counts of reads mapping to each gene feature in the GFF annotations was completed using  
680 featureCounts (64). The outputs from featureCounts were analyzed within RStudio (Build 443)  
681 following the DESeq2 v1.32.0 vignette (65).

682

#### 683 **Acknowledgements**

684 The authors are grateful to Dr. Marc Jan Gubbels (Boston College) for sharing plasmids; Dr.  
685 Kelley Thomas, Steven Smith and Joe Sevigny at the UNH Hubbard Center for Genomics for  
686 assistance with RNA sequencing and analysis; and Dr. Doug Rusch and Chris Hemmerich at  
687 IU Center for Genomics and Bioinformatics for assistance with CUT&TAG sequencing and  
688 analysis. Molecular graphics and analyses performed with UCSF Chimera, developed by the  
689 Resource for Biocomputing, Visualization, and Informatics at the University of California, San  
690 Francisco, with support from NIH P41-GM103311.

691 VJ is supported as a Project Lead by CIBBR through a grant from NIGMS (P20GM113131) at  
692 NIH.

693

## 694 **References**

- 695 1. Dixon SE, Stilger KL, Elias EV, Naguleswaran A, Sullivan WJ. A decade of epigenetic  
696 research in *Toxoplasma gondii*. *Mol Biochem Parasitol*. 2010 Sep;173(1):1–9.
- 697 2. Vanagas L, Jeffers V, Bogado SS, Dalmasso MC, Sullivan WJ, Angel SO. *Toxoplasma*  
698 histone acetylation remodelers as novel drug targets. *Expert Rev Anti Infect Ther*. 2012  
699 Oct;10(10):1189–201.
- 700 3. Nardelli SC, Che FY, Monerri NCS de, Xiao H, Nieves E, Madrid-Aliste C, et al. The  
701 Histone Code of *Toxoplasma gondii* Comprises Conserved and Unique Posttranslational  
702 Modifications. *mBio* [Internet]. 2013 Dec 31 [cited 2020 Aug 20];4(6). Available from:  
703 <https://mbio.asm.org/content/4/6/e00922-13>
- 704 4. Bhatti MM, Livingston M, Mullapudi N, Sullivan WJ. Pair of unusual GCN5 histone  
705 acetyltransferases and ADA2 homologues in the protozoan parasite *Toxoplasma gondii*.  
706 *Eukaryot Cell*. 2006 Jan;5(1):62–76.
- 707 5. Harris MT, Jeffers V, Martynowicz J, True JD, Mosley AL, Sullivan WJ. A novel GCN5b  
708 lysine acetyltransferase complex associates with distinct transcription factors in the  
709 protozoan parasite *Toxoplasma gondii*. *Mol Biochem Parasitol*. 2019 Sep 1;232:111203.
- 710 6. Naguleswaran A, Elias EV, McClintick J, Edenberg HJ, Sullivan WJ. *Toxoplasma gondii*  
711 lysine acetyltransferase GCN5-A functions in the cellular response to alkaline stress and  
712 expression of cyst genes. *PLoS Pathog*. 2010 Dec 16;6(12):e1001232.
- 713 7. Wang J, Dixon SE, Ting LM, Liu TK, Jeffers V, Croken MM, et al. Lysine acetyltransferase  
714 GCN5b interacts with AP2 factors and is required for *Toxoplasma gondii* proliferation.  
715 *PLoS Pathog*. 2014 Jan;10(1):e1003830.
- 716 8. Sindikubwabo F, Ding S, Hussain T, Ortet P, Barakat M, Baumgarten S, et al. Modifications  
717 at K31 on the lateral surface of histone H4 contribute to genome structure and expression  
718 in apicomplexan parasites. Zilberman D, editor. *eLife*. 2017 Nov 4;6:e29391.
- 719 9. Bougdour A, Maubon D, Baldacci P, Ortet P, Bastien O, Bouillon A, et al. Drug inhibition of  
720 HDAC3 and epigenetic control of differentiation in Apicomplexa parasites. *J Exp Med*. 2009  
721 Apr 6;206(4):953–66.
- 722 10. Saksouk N, Bhatti MM, Kieffer S, Smith AT, Musset K, Garin J, et al. Histone-Modifying  
723 Complexes Regulate Gene Expression Pertinent to the Differentiation of the Protozoan  
724 Parasite *Toxoplasma gondii*. *Mol Cell Biol*. 2005 Dec;25(23):10301–14.



- 725 11. Hanquier J, Gimeno T, Jeffers V, Sullivan WJ. Evaluating the GCN5b bromodomain as a  
726 novel therapeutic target against the parasite *Toxoplasma gondii*. *Exp Parasitol*. 2020 Apr  
727 1;211:107868.
- 728 12. Jeffers V, Gao H, Checkley LA, Liu Y, Ferdig MT, Sullivan WJ. Garcinol Inhibits GCN5-  
729 Mediated Lysine Acetyltransferase Activity and Prevents Replication of the Parasite  
730 *Toxoplasma gondii*. *Antimicrob Agents Chemother*. 2016 Apr;60(4):2164–70.
- 731 13. Darkin-Rattray SJ, Gurnett AM, Myers RW, Dulski PM, Crumley TM, Allocco JJ, et al.  
732 Apicidin: A novel antiprotozoal agent that inhibits parasite histone deacetylase. *Proc Natl*  
733 *Acad Sci*. 1996 Nov 12;93(23):13143–7.
- 734 14. Dhalluin C, Carlson JE, Zeng L, He C, Aggarwal AK, Zhou MM. Structure and ligand of a  
735 histone acetyltransferase bromodomain. *Nature*. 1999 Jun;399(6735):491–6.
- 736 15. Kulikowski E, Rakai BD, Wong NCW. Inhibitors of bromodomain and extra-terminal  
737 proteins for treating multiple human diseases. *Med Res Rev*. 2021;41(1):223–45.
- 738 16. Josling GA, Petter M, Oehring SC, Gupta AP, Dietz O, Wilson DW, et al. A *Plasmodium*  
739 *Falciparum* Bromodomain Protein Regulates Invasion Gene Expression. *Cell Host Microbe*.  
740 2015 Jun 10;17(6):741–51.
- 741 17. Santos JM, Josling G, Ross P, Joshi P, Orchard L, Campbell T, et al. Red Blood Cell  
742 Invasion by the Malaria Parasite Is Coordinated by the PfAP2-I Transcription Factor. *Cell*  
743 *Host Microbe*. 2017 Jun 14;21(6):731-741.e10.
- 744 18. Quinn JE, Jeninga MD, Limm K, Pareek K, Meißgeier T, Bachmann A, et al. The Putative  
745 Bromodomain Protein PfBDP7 of the Human Malaria Parasite *Plasmodium Falciparum*  
746 Cooperates With PfBDP1 in the Silencing of Variant Surface Antigen Expression. *Front*  
747 *Cell Dev Biol* [Internet]. 2022 [cited 2022 Nov 30];10. Available from:  
748 <https://www.frontiersin.org/articles/10.3389/fcell.2022.816558>
- 749 19. Jeffers V, Kamau ET, Srinivasan AR, Harper J, Sankaran P, Post SE, et al. TgPRELID, a  
750 Mitochondrial Protein Linked to Multidrug Resistance in the Parasite *Toxoplasma gondii*.  
751 *mSphere*. 2017 Feb;2(1).
- 752 20. Jeffers V, Yang C, Huang S, Sullivan WJ. Bromodomains in Protozoan Parasites:  
753 Evolution, Function, and Opportunities for Drug Development. *Microbiol Mol Biol Rev*  
754 *MMBR*. 2017 Mar;81(1).
- 755 21. Fleck K, Nitz M, Jeffers V. “Reading” a new chapter in protozoan parasite transcriptional  
756 regulation. *PLOS Pathog*. 2021 Dec 2;17(12):e1010056.

- 757 22. Owen DJ, Ornaghi P, Yang JC, Lowe N, Evans PR, Ballario P, et al. The structural basis  
758 for the recognition of acetylated histone H4 by the bromodomain of histone  
759 acetyltransferase Gcn5p. *EMBO J.* 2000 Nov 15;19(22):6141–9.
- 760 23. Yang J, Yan R, Roy A, Xu D, Poisson J, Zhang Y. The I-TASSER Suite: protein structure  
761 and function prediction. *Nat Methods.* 2015 Jan;12(1):7–8.
- 762 24. Singh AK, Phillips M, Alkrimi S, Tonelli M, Boyson SP, Malone KL, et al. Structural insights  
763 into acetylated histone ligand recognition by the BDP1 bromodomain of *Plasmodium*  
764 *falciparum*. *Int J Biol Macromol.* 2022 Dec 31;223:316–26.
- 765 25. Amos B, Aurrecochea C, Barba M, Barreto A, Basenko EY, Bažant W, et al. VEuPathDB:  
766 the eukaryotic pathogen, vector and host bioinformatics resource center. *Nucleic Acids*  
767 *Res.* 2022 Jan 7;50(D1):D898–911.
- 768 26. Lee VV, Judd LM, Jex AR, Holt KE, Tonkin CJ, Ralph SA. Direct Nanopore Sequencing of  
769 mRNA Reveals Landscape of Transcript Isoforms in Apicomplexan Parasites. *mSystems.*  
770 2021 Mar 9;6(2):e01081-20.
- 771 27. Sidik SM, Huet D, Ganesan SM, Huynh MH, Wang T, Nasamu AS, et al. A Genome-wide  
772 CRISPR Screen in *Toxoplasma* Identifies Essential Apicomplexan Genes. *Cell.* 2016 Sep  
773 8;166(6):1423-1435.e12.
- 774 28. Mellacheruvu D, Wright Z, Couzens AL, Lambert JP, St-Denis NA, Li T, et al. The  
775 CRAPome: a contaminant repository for affinity purification-mass spectrometry data. *Nat*  
776 *Methods.* 2013 Aug;10(8):730–6.
- 777 29. Kaya-Okur HS, Wu SJ, Codomo CA, Pledger ES, Bryson TD, Henikoff JG, et al. CUT&Tag  
778 for efficient epigenomic profiling of small samples and single cells. *Nat Commun.* 2019  
779 Dec;10(1):1930.
- 780 30. Gissot M, Kelly KA, Ajioka JW, Grealley JM, Kim K. Epigenomic Modifications Predict Active  
781 Promoters and Gene Structure in *Toxoplasma gondii*. *PLOS Pathog.* 2007 Jun 8;3(6):e77.
- 782 31. Markus BM, Waldman BS, Lorenzi HA, Lourido S. High-Resolution Mapping of  
783 Transcription Initiation in the Asexual Stages of *Toxoplasma gondii*. *Front Cell Infect*  
784 *Microbiol.* 2020;10:617998.
- 785 32. Waldman BS, Schwarz D, Wadsworth MH, Saeij JP, Shalek AK, Lourido S. Identification of  
786 a Master Regulator of Differentiation in *Toxoplasma*. *Cell.* 2020 Jan 23;180(2):359-  
787 372.e16.

- 788 33. Behnke MS, Wootton JC, Lehmann MM, Radke JB, Lucas O, Nawas J, et al. Coordinated  
789 Progression through Two Subtranscriptomes Underlies the Tachyzoite Cycle of  
790 *Toxoplasma gondii*. PLOS ONE. 2010 Aug 26;5(8):e12354.
- 791 34. Van Poppel NFJ, Welagen J, Vermeulen AN, Schaap D. The complete set of *Toxoplasma*  
792 *gondii* ribosomal protein genes contains two conserved promoter elements. Parasitology.  
793 2006 Jul;133(Pt 1):19–31.
- 794 35. Yamagishi J, Wakaguri H, Ueno A, Goo YK, Tolba M, Igarashi M, et al. High-Resolution  
795 Characterization of *Toxoplasma gondii* Transcriptome with a Massive Parallel Sequencing  
796 Method. DNA Res. 2010 Aug 1;17(4):233–43.
- 797 36. Shea M, Jäkke U, Liu Q, Berry C, Joiner KA, Soldati-Favre D. A family of aspartic proteases  
798 and a novel, dynamic and cell-cycle-dependent protease localization in the secretory  
799 pathway of *Toxoplasma gondii*. Traffic Cph Den. 2007 Aug;8(8):1018–34.
- 800 37. Farhat DC, Swale C, Dard C, Cannella D, Ortet P, Barakat M, et al. A MORC-driven  
801 transcriptional switch controls *Toxoplasma* developmental trajectories and sexual  
802 commitment. Nat Microbiol. 2020 Apr;5(4):570–83.
- 803 38. Mineo TWP, Chern JH, Thind AC, Mota CM, Nadipuram SM, Torres JA, et al. Efficient  
804 Gene Knockout and Knockdown Systems in *Neospora caninum* Enable Rapid Discovery  
805 and Functional Assessment of Novel Proteins. mSphere. 2022 Jan 12;7(1):e00896-21.
- 806 39. Radke JB, Lucas O, De Silva EK, Ma Y, Sullivan WJ, Weiss LM, et al. ApiAP2 transcription  
807 factor restricts development of the *Toxoplasma* tissue cyst. Proc Natl Acad Sci U S A. 2013  
808 Apr 23;110(17):6871–6.
- 809 40. Licon MH, Giuliano CJ, Chakladar S, Shallberg L, Waldman BS, Hunter CA, et al. A  
810 positive feedback loop controls *Toxoplasma* chronic differentiation [Internet]. bioRxiv; 2022  
811 [cited 2022 Dec 1]. p. 2022.04.06.487076. Available from:  
812 <https://www.biorxiv.org/content/10.1101/2022.04.06.487076v1>
- 813 41. Ramakrishnan C, Maier S, Walker RA, Rehrauer H, Joekel DE, Winiger RR, et al. An  
814 experimental genetically attenuated live vaccine to prevent transmission of *Toxoplasma*  
815 *gondii* by cats. Sci Rep. 2019 Feb 6;9(1):1474.
- 816 42. Zhang Y, Cheng L, Qiu H, Sun T, Deng R, Gong H, et al. Hypothetical bromodomain-  
817 containing protein 5 is required for the growth of *Toxoplasma gondii*. Vet Parasitol. 2022  
818 Sep 1;309:109767.

- 819 43. Theisen TC, Boothroyd JC. Transcriptional signatures of clonally derived *Toxoplasma*  
820 tachyzoites reveal novel insights into the expression of a family of surface proteins. *PLoS*  
821 *One*. 2022;17(2):e0262374.
- 822 44. Hoeijmakers WAM, Miao J, Schmidt S, Toenhake CG, Shrestha S, Venhuizen J, et al.  
823 Epigenetic reader complexes of the human malaria parasite, *Plasmodium falciparum*.  
824 *Nucleic Acids Res*. 2019 Dec 16;47(22):11574–88.
- 825 45. Collins RE, Northrop JP, Horton JR, Lee DY, Zhang X, Stallcup MR, et al. The ankyrin  
826 repeats of G9a and GLP histone methyltransferases are mono- and dimethyllysine binding  
827 modules. *Nat Struct Mol Biol*. 2008 Mar;15(3):245–50.
- 828 46. Jeffers V, Sullivan WJ. Lysine acetylation is widespread on proteins of diverse function and  
829 localization in the protozoan parasite *Toxoplasma gondii*. *Eukaryot Cell*. 2012  
830 Jun;11(6):735–42.
- 831 47. Xue B, Jeffers V, Sullivan WJ, Uversky VN. Protein intrinsic disorder in the acetylome of  
832 intracellular and extracellular *Toxoplasma gondii*. *Mol Biosyst*. 2013 Apr 5;9(4):645–57.
- 833 48. Kloehn J, Oppenheim RD, Siddiqui G, De Bock PJ, Kumar Dogga S, Coute Y, et al. Multi-  
834 omics analysis delineates the distinct functions of sub-cellular acetyl-CoA pools in  
835 *Toxoplasma gondii*. *BMC Biol*. 2020 Jun 16;18(1):67.
- 836 49. Sheiner L, Demerly JL, Poulsen N, Beatty WL, Lucas O, Behnke MS, et al. A systematic  
837 screen to discover and analyze apicoplast proteins identifies a conserved and essential  
838 protein import factor. *PLoS Pathog*. 2011 Dec;7(12):e1002392.
- 839 50. Huynh MH, Carruthers VB. Tagging of endogenous genes in a *Toxoplasma gondii* strain  
840 lacking Ku80. *Eukaryot Cell*. 2009 Apr;8(4):530–9.
- 841 51. Tamura K, Stecher G, Kumar S. MEGA11: Molecular Evolutionary Genetics Analysis  
842 Version 11. *Mol Biol Evol*. 2021 Jun 25;38(7):3022–7.
- 843 52. Pettersen EF, Goddard TD, Huang CC, Couch GS, Greenblatt DM, Meng EC, et al. UCSF  
844 Chimera--a visualization system for exploratory research and analysis. *J Comput Chem*.  
845 2004 Oct;25(13):1605–12.
- 846 53. Jacot D, Fréna1 K, Marq JB, Sharma P, Soldati-Favre D. Assessment of phosphorylation in  
847 *Toxoplasma* glideosome assembly and function. *Cell Microbiol*. 2014 Oct;16(10):1518–32.
- 848 54. Suarez C, Lodoen MB, Lebrun M. Assessing Rhoptry Secretion in *T. gondii*. *Methods Mol*  
849 *Biol Clifton NJ*. 2020;2071:143–55.

- 850 55. Wu T, Nance J, Chu F, Fazio TG. Characterization of R-Loop-Interacting Proteins in  
851 Embryonic Stem Cells Reveals Roles in rRNA Processing and Gene Expression. *Mol Cell*  
852 *Proteomics MCP*. 2021;20:100142.
- 853 56. Chalkley RJ, Baker PR, Huang L, Hansen KC, Allen NP, Rexach M, et al. Comprehensive  
854 analysis of a multidimensional liquid chromatography mass spectrometry dataset acquired  
855 on a quadrupole selecting, quadrupole collision cell, time-of-flight mass spectrometer: II.  
856 New developments in Protein Prospector allow for reliable and comprehensive automatic  
857 analysis of large datasets. *Mol Cell Proteomics MCP*. 2005 Aug;4(8):1194–204.
- 858 57. Martin M. Cutadapt removes adapter sequences from high-throughput sequencing reads.  
859 *EMBnet.journal*. 2011 May 2;17(1):10–2.
- 860 58. Kim D, Paggi JM, Park C, Bennett C, Salzberg SL. Graph-based genome alignment and  
861 genotyping with HISAT2 and HISAT-genotype. *Nat Biotechnol*. 2019 Aug;37(8):907–15.
- 862 59. Danecek P, Bonfield JK, Liddle J, Marshall J, Ohan V, Pollard MO, et al. Twelve years of  
863 SAMtools and BCFtools. *GigaScience*. 2021 Feb 16;10(2):giab008.
- 864 60. Zhang Y, Liu T, Meyer CA, Eeckhoute J, Johnson DS, Bernstein BE, et al. Model-based  
865 Analysis of ChIP-Seq (MACS). *Genome Biol*. 2008 Sep 17;9(9):R137.
- 866 61. Ramírez F, Ryan DP, Grüning B, Bhardwaj V, Kilpert F, Richter AS, et al. deepTools2: a  
867 next generation web server for deep-sequencing data analysis. *Nucleic Acids Res*. 2016  
868 Jul 8;44(W1):W160-165.
- 869 62. Machanick P, Bailey TL. MEME-ChIP: motif analysis of large DNA datasets. *Bioinforma*  
870 *Oxf Engl*. 2011 Jun 15;27(12):1696–7.
- 871 63. Bolger AM, Lohse M, Usadel B. Trimmomatic: a flexible trimmer for Illumina sequence  
872 data. *Bioinforma Oxf Engl*. 2014 Aug 1;30(15):2114–20.
- 873 64. Liao Y, Smyth GK, Shi W. featureCounts: an efficient general purpose program for  
874 assigning sequence reads to genomic features. *Bioinforma Oxf Engl*. 2014 Apr  
875 1;30(7):923–30.
- 876 65. Love MI, Huber W, Anders S. Moderated estimation of fold change and dispersion for  
877 RNA-seq data with DESeq2. *Genome Biol*. 2014;15(12):550.
- 878

879

880 **Figure 1. TgBDP1 is a bromodomain containing protein that is conserved among**  
881 **alveolates.** A) Depiction of TgBDP1 protein size and domain architecture. B) Phylogenetic tree  
882 of TgBDP1 protein homologues drawn to scale, with branch lengths measured in the number  
883 of substitutions per site. C) Evolutionary tree with genera containing predicted TgBDP1  
884 homologues in red. Apicomplexans are in blue shaded box and blue dotted line encompasses  
885 alveolates. Branch lengths are not to scale. D) Multiple alignment of bromodomain amino acid  
886 sequences from representative species, with TgBDP1 denoted as TGME49\_263580 BDP1.  
887 The highly conserved tyrosine (Y) and asparagine (N) residues required for binding acetylated  
888 lysines are boxed in red. E) The predicted structure of the TgBDP1 bromodomain (pink)  
889 overlaid with the *Homo sapiens* B2AZB bromodomain (green, PDB:5DYU) and *Plasmodium*  
890 *falciparum* PfBDP1 bromodomain (blue, PDB:7M97).

891

892 **Figure 2. Generation of a *tgbdp1* inducible knockdown.** A) Strategy for *tgbdp1* promoter  
893 replacement with a tetracycline-regulatable promoter, and insertion of an N-terminal myc tag  
894 (orange). The *dhfr* gene was inserted for selection of transgenic parasites with pyrimethamine  
895 resistance. Primers used to confirm integration are included. B) PCRs confirming correct  
896 genomic modification. Primers P1 and P2 amplify a 2,175bp fragment only present in the  
897 transgenic line (<sup>tet-myc</sup>TgBDP1), and primers P3 and P4 amplify a 2,543bp fragment only in the  
898 parental (TATi) genome. C) RT-qPCR of *tgbdp1* mRNA levels normalized to the -ATc sample,  
899 n=3, \*\*\*\* = p-value <0.0001. D) Western blotting of <sup>tet-myc</sup>TgBDP1 lysates from parasites  
900 cultured -ATc and +ATc for 12, 24, 36, and 48hrs. TgSAG1 was included as a loading control.  
901 E) IFA of <sup>tet-myc</sup>TgBDP1 parasites cultured 24hrs -ATc and +ATc.

902

903 **Figure 3. Loss of TgBDP1 causes significant defects in host cell invasion and parasite**  
904 **replication.** A) Plaque assays were conducted with the <sup>tet-myc</sup>TgBDP1 and parental (TATi)  
905 parasite lines -ATc and +ATc. Images are representative from three independent experiments  
906 after six days of growth. The area lysed was calculated as a percentage of -ATc. B) Invasion  
907 assays were performed by counting the number of parasites that invaded host cells and  
908 calculated as a percentage of -ATc. C) Doubling assays were performed by counting the  
909 number of parasites per vacuole for 100 vacuoles at 12, 24 and 36hrs after inoculation, and

910 plotted as a percentage of the total number of vacuoles. All experiments were done in triplicate  
911 and unpaired t-tests performed for plaque and invasion assays, n=3, \*\*\*\* = p-value <0.0001.

912

913 **Figure 4. TgBDP1 is a nuclear protein that interacts with transcriptional and chromatin**  
914 **regulatory proteins.** A) TgBDP1 was tagged at the C-terminus with 3xHA. Western blotting of  
915 parasite lysate showed the tagged protein at the predicted size (81kDa) with no signal  
916 detected in the parental line ( $\Delta$ ku80). SAG1 was used as a loading control. Nuclear localization  
917 of tagged TgBDP1 was confirmed by IFA. B) CoIPs of both TgBDP1<sup>HA</sup> and parental lines were  
918 conducted and enriched proteins identified by mass spectrometry. SAINT probability scores  
919 are plotted against log<sub>2</sub>(fold change) from all three replicates. TgBDP1 and its most significant  
920 interactors are plotted in blue. Other highly probable interactors are plotted in orange. Scores  
921 and gene IDs are detailed in the adjacent table.

922

923 **Figure 5. TgBDP1 binds upstream of many protein coding genes.** A) Alignment of peak  
924 intensities of three replicates of TgBDP1 CUT&Tag and a negative control mapped to the  
925 *Toxoplasma* ME49 genome. The data range is set the same between all four tracks. B) A  
926 breakdown of the location of all TgBDP1 peaks relative to protein-coding genes. C)  
927 Representative snapshot of TgBDP1 peaks aligning with transcriptional start sites (TSS) of  
928 three genes on chromosome VIIa. D) Density graph of TgBDP1 and H3K9ac peaks located -  
929 2kb and +1kb from TSS. E) Heatmap of TgBDP1 and H3K9ac peak densities at gene  
930 distances from TSS. F) Venn diagram of the number of genes with TgBDP1 and H3K9ac  
931 peaks at TSS.

932

933 **Figure 6. TgBDP1 is predominantly recruited to promoters of active genes.** A) Relative  
934 transcript abundance of putative TgBDP1 target genes in tachyzoites (x-axis) and after 48hr of  
935 bradyzoite induction (y-axis) (32). Blue markers: transcripts upregulated two-fold or more;  
936 Orange markers: transcripts downregulated two-fold or more; Grey: transcripts not significantly  
937 changed during bradyzoite differentiation. B) Left: pie chart of percentage of predicted  
938 transcription factor genes with (orange) and without (blue) TgBDP1 bound. Right: bar graph  
939 showing percentage of each family of transcription factor genes bound by TgBDP1. C) Motif

940 analysis of TSS sequences associated with TgBDP1. Top: the two most significant motifs  
941 identified and their p-values. Bottom: location of each motif from TSS.

942

943 **Figure 7. TgBDP1 down-regulation causes global dysregulation of gene expression.** A)

944 Bar graph depicting the number of genes up- and down-regulated identified by RNA-seq in <sup>tet-</sup>  
945 <sup>myc</sup>TgBDP1 parasites incubated for 12, 24 and 36hrs with ATc. Black shading indicates the  
946 number of those genes with TgBDP1 found at the gene TSS from CUT&Tag analysis of  
947 TgBDP1 binding sites. B) Venn diagrams of genes up- and down-regulated between all three  
948 timepoints. TgBDP2 is the only gene differentially expressed at all three timepoints that is also  
949 bound by TgBDP1 at its TSS. C) Volcano plots of differentially genes in <sup>tet-myc</sup>TgBDP1  
950 knockdown parasites at 12 and 24hrs. Genes up- or down-regulated two-fold or more are in  
951 orange and those also identified as TgBDP1-bound by CUT&Tag are in blue. The table shows  
952 specific transcription factors differentially expressed at 24hr post knockdown.

953

954 **Supplemental Figure 1. TgBDP1 has an mRNA isoform, TgBDP1a.** A) Screen capture from

955 ToxoDB genome browser showing the predicted *tgbdp1* gene with exons (blue boxes) and  
956 intron (lines) on top. Underneath is predicted introns with red arrows identifying the two distinct  
957 isoforms. Nanopore sequencing read alignments of *Toxoplasma* mRNAs are shown with the  
958 63 nucleotide isoform region flanked by red dashed lines. B) Predicted TgBDP1 protein  
959 sequence with ankyrin repeats highlighted in green, bromodomain in blue and the sequence  
960 missing from TgBDP1a in yellow. C) Multiple sequence alignment of cDNA encompassing the  
961 63 isoform nucleotides from six different *tgbdp1* clones. Clones 1-3 have the full predicted  
962 sequence (*tgbdp1*) while clones 3-6 are missing the 63 nucleotides (*tgbdp1a*). D) Screen  
963 capture from ToxoDB genome browser showing the *tgbdp1* gene model with exons (yellow  
964 boxes) and introns (lines), with RNA-sequencing peaks of one replicate from our parasite line  
965 <sup>tet-myc</sup>TgBDP1. Inset depicts the end of the first exon and beginning of the first intron, and RNA-  
966 sequencing peaks from all three replicates with the 63 nucleotide region flanked by dashed  
967 lines.

968



969 **Supplemental Figure 2. Parental parasite line (TATi) replicates normally in the presence**  
970 **of ATc.** A *Toxoplasma* doubling assay was performed with parasites -ATc and +ATc. The  
971 number of parasites per vacuole was counted at 12, 24 and 36hrs after inoculation.

972

973 **Supplemental Figure 3. Life cycle expression of genes impacted during *tgbdp1***  
974 **knockdown in tachyzoites.** Heat maps of relative gene expression levels of the genes that  
975 are significantly downregulated (left) and upregulated (right) during *tgbdp1* knockdown. Gene  
976 expression data for parasite stages from Ramakrishnan *et al.* (41) was clustered according to  
977 the life cycle stage(s) in which expression peaks. Labels indicate the stage of peak gene  
978 expression for each gene cluster.

979

980

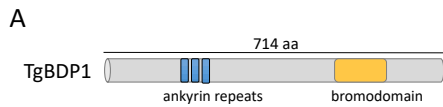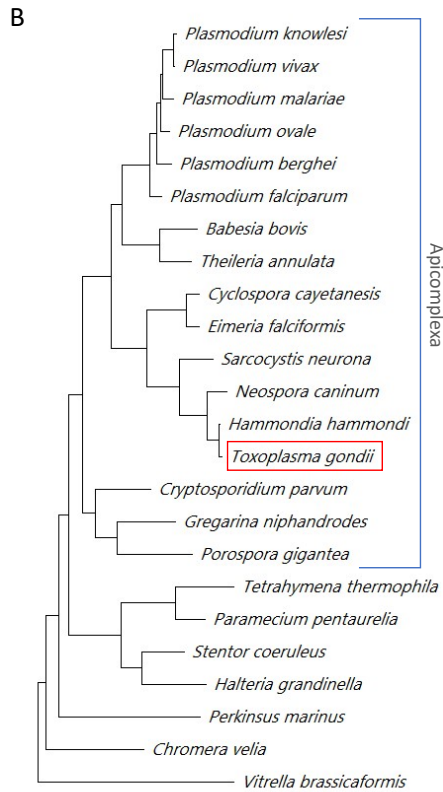

0.50

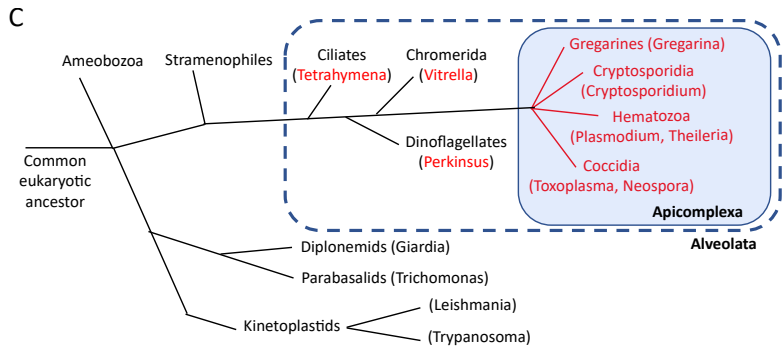

**D**

|                           |              |       |     |      |      |     |    |     |    |    |    |    |    |    |    |    |   |   |   |   |    |   |   |
|---------------------------|--------------|-------|-----|------|------|-----|----|-----|----|----|----|----|----|----|----|----|---|---|---|---|----|---|---|
| TGME49_263580_BDP1        | WQSAASALLSEL | LSKYE | GGH | IFEK | FVDP | PKT | -- | APG | YD | VV | TR | PM | SL | SC | IK | IK | K | S | D | Y | T  | H |   |
| Neospora_caninum          | WQSAASALLSEL | LSKYE | GGH | IFEK | FVDP | PKT | -- | APG | YD | VV | TR | PM | SL | SC | IK | IK | K | S | D | Y | T  | H |   |
| Plasmodium_falciparum_3D7 | WYLLANQLILS  | LSKYE | GGH | IFEK | L    | VDA | KQ | K   | Q  | N  | P  | D  | H  | I  | D  | V  | K | N | P | S | F  | S | C |
| Theileria_annulata        | WYSLANLLSTI  | LLKQ  | EG  | GV   | V    | E   | K  | F   | V  | D  | P  | K  | Q  | N  | P  | D  | H | I | D | V | K  | N | P |
| Cryptosporidium_parvum    | WYKTI        | SE    | CV  | VE   | LR   | KQ  | EG | GV  | V  | E  | K  | F  | V  | D  | P  | K  | Q | N | P | D | H  | I | D |
| Gregarina_niphandrodes    | WYKTI        | SE    | CV  | VE   | LR   | KQ  | EG | GV  | V  | E  | K  | F  | V  | D  | P  | K  | Q | N | P | D | H  | I | D |
| Tetrahymena_thermophila   | WYKTI        | SE    | CV  | VE   | LR   | KQ  | EG | GV  | V  | E  | K  | F  | V  | D  | P  | K  | Q | N | P | D | H  | I | D |
| Perkinsus_olseni          | WYKTI        | SE    | CV  | VE   | LR   | KQ  | EG | GV  | V  | E  | K  | F  | V  | D  | P  | K  | Q | N | P | D | H  | I | D |
| Vitrella_brassicaformis   | WYKTI        | SE    | CV  | VE   | LR   | KQ  | EG | GV  | V  | E  | K  | F  | V  | D  | P  | K  | Q | N | P | D | H  | I | D |
| Homo_sapiens_BAZ2b        | ----         | SM    | L   | T    | E    | M   | E  | T   | H  | E  | D  | A  | F  | L  | L  | V  | N | L | K | L | -- | V | P |
|                           | :            | :     | :   | :    | :    | :   | :  | :   | :  | :  | :  | :  | :  | :  | :  | :  | : | : | : | : | :  | : | : |
|                           | :            | :     | :   | :    | :    | :   | :  | :   | :  | :  | :  | :  | :  | :  | :  | :  | : | : | : | : | :  | : | : |
| TGME49_263580_BDP1        | QQFL         | K     | D   | V    | E    | Q   | V  | I   | N  | C  | E  | L  | L  | I  | N  | D  | Q | G | S | W | V  | S | I |
| Neospora_caninum          | QQFL         | K     | D   | V    | E    | Q   | V  | I   | N  | C  | E  | L  | L  | I  | N  | D  | Q | G | S | W | V  | S | I |
| Plasmodium_falciparum_3D7 | SEFF         | V     | D   | V    | L    | F   | D  | N   | C  | S  | L  | N  | E  | S  | N  | S  | V | V | A | I | G  | N | I |
| Theileria_annulata        | QQF          | V     | D   | V    | L    | F   | D  | N   | C  | S  | L  | N  | E  | S  | N  | S  | V | V | A | I | G  | N | I |
| Cryptosporidium_parvum    | RET          | I     | A   | I    | Q    | I   | Q  | F   | S  | N  | C  | L  | V  | N  | K  | P  | D | S | V | S | L  | C | A |
| Gregarina_niphandrodes    | NDF          | I     | D   | M    | L    | V   | S  | N   | C  | Y  | K  | N  | P  | A  | H  | S  | N | V | H | G | A  | L | K |
| Tetrahymena_thermophila   | KQY          | L     | E   | D    | M    | L   | V  | S   | N  | C  | Y  | K  | N  | P  | A  | H  | S | N | V | H | G  | A | L |
| Perkinsus_olseni          | LLF          | Y     | E   | D    | C    | D   | V  | F   | I  | N  | C  | A  | L  | V  | N  | K  | P | D | S | V | S  | L | C |
| Vitrella_brassicaformis   | T            | D     | F   | E    | S    | D   | F  | I   | M  | L  | S  | N  | C  | F  | E  | Y  | N | A | P | T | L  | F | Y |
| Homo_sapiens_BAZ2b        | E            | T     | F   | A    | L    | D   | V  | L   | V  | F  | D  | N  | C  | E  | T  | F  | E | D | S | D | I  | G | R |
|                           | *            | :     | :   | :    | :    | :   | :  | :   | :  | :  | :  | :  | :  | :  | :  | :  | : | : | : | : | :  | : | : |
|                           | *            | :     | :   | :    | :    | :   | :  | :   | :  | :  | :  | :  | :  | :  | :  | :  | : | : | : | : | :  | : | : |

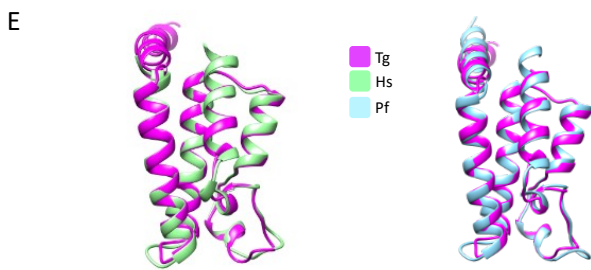

Figure 1

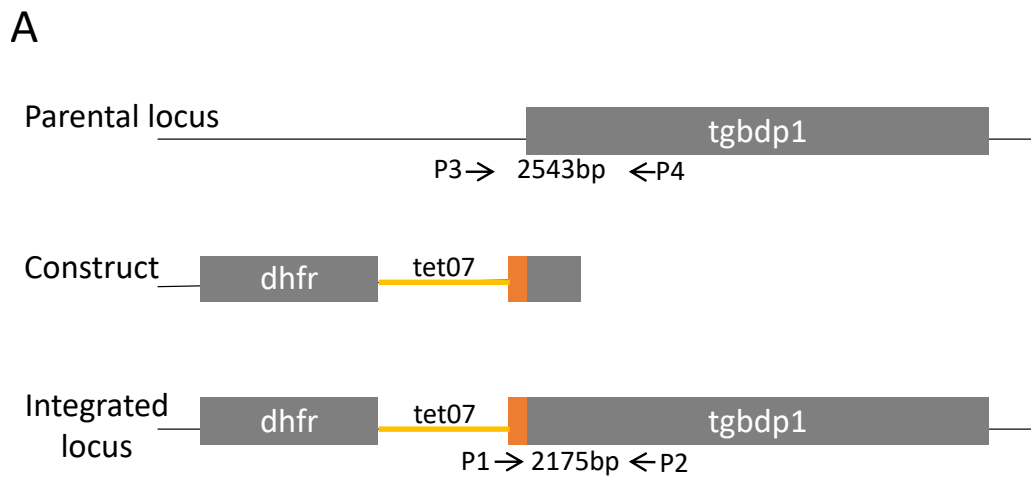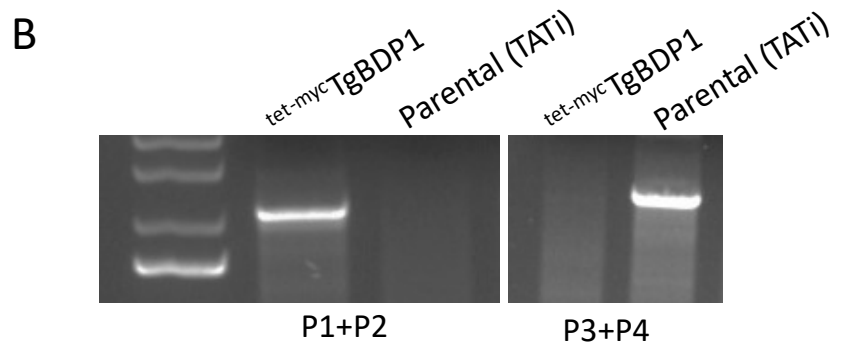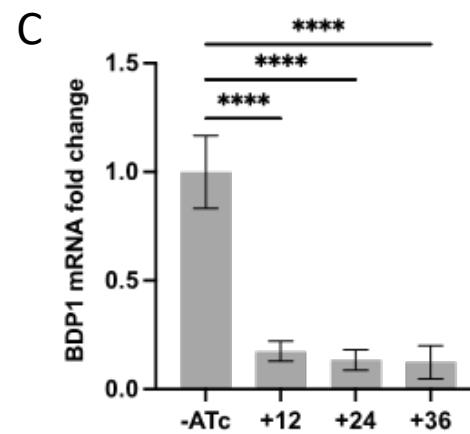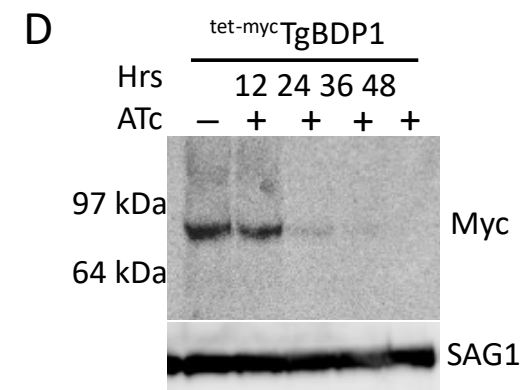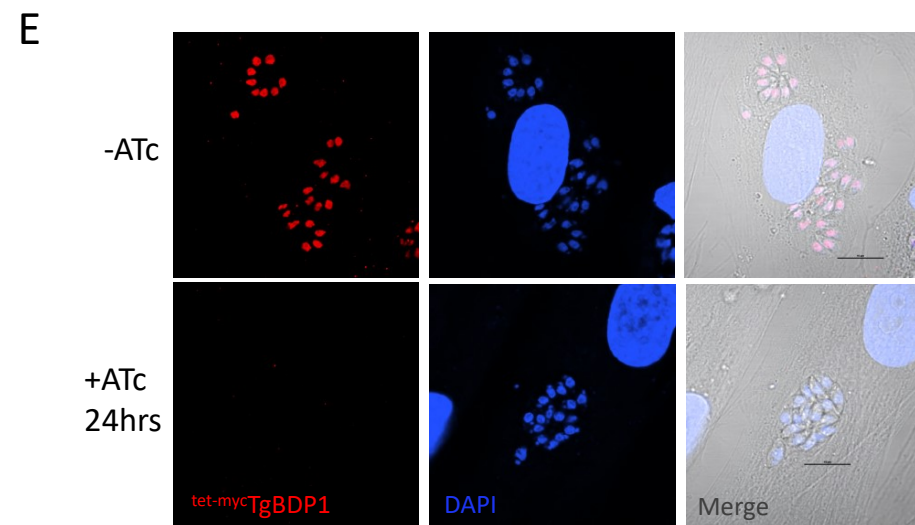

Figure 2

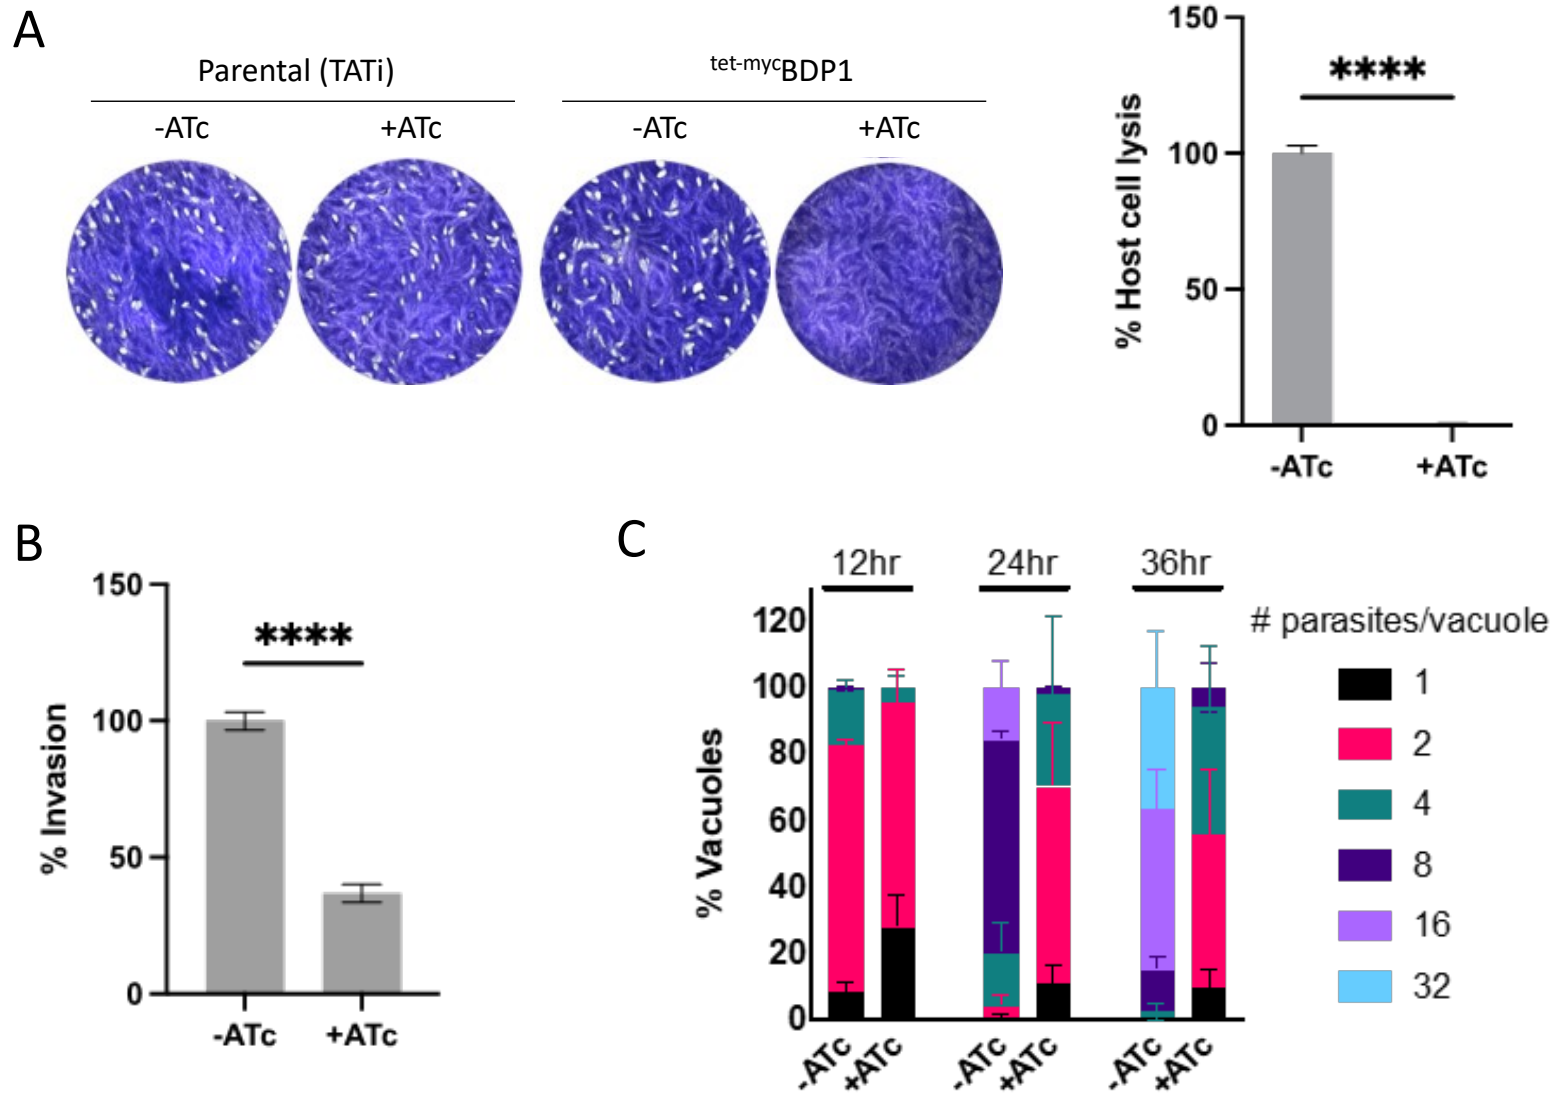

Figure 3

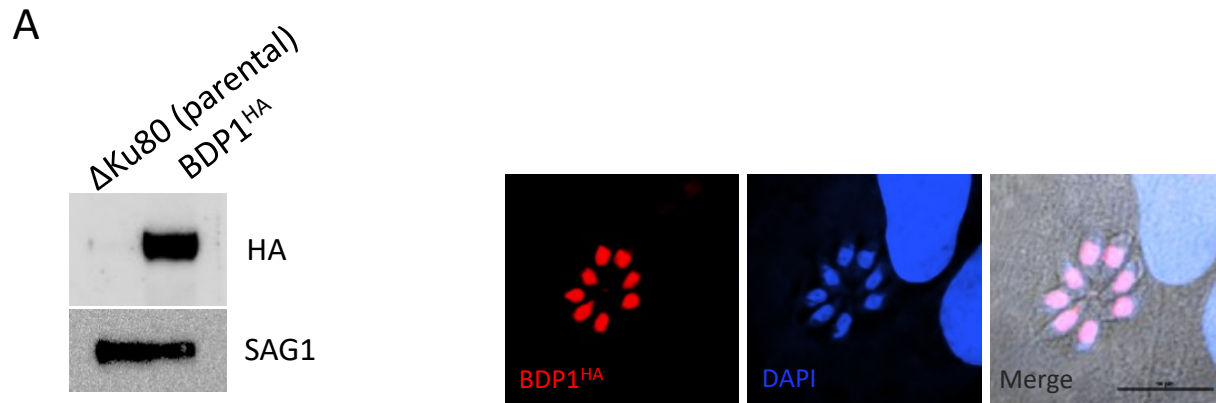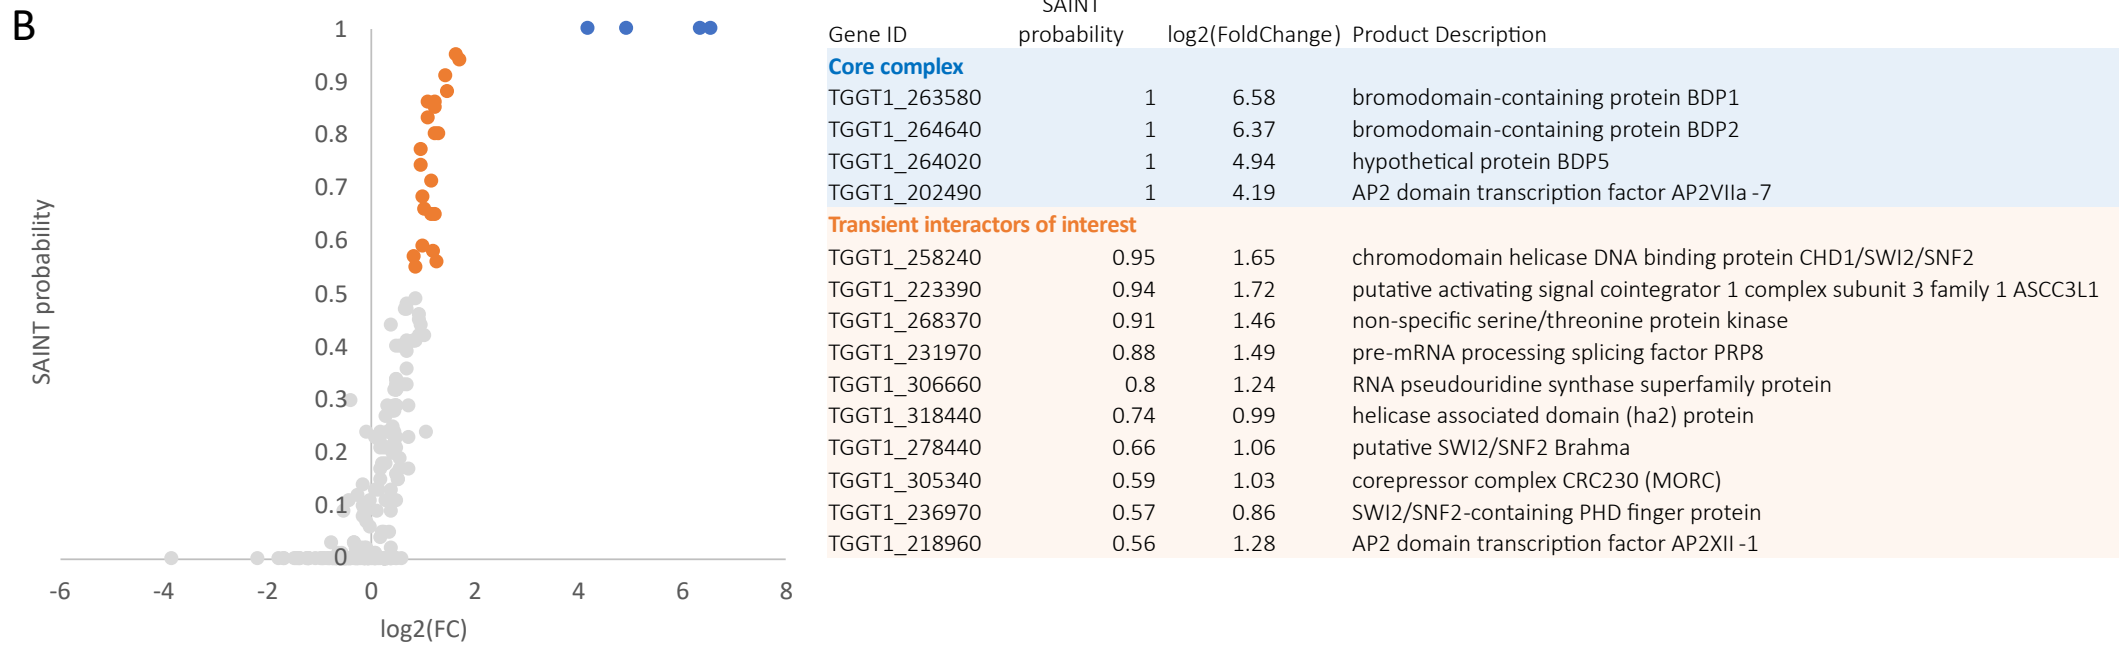

Figure 4

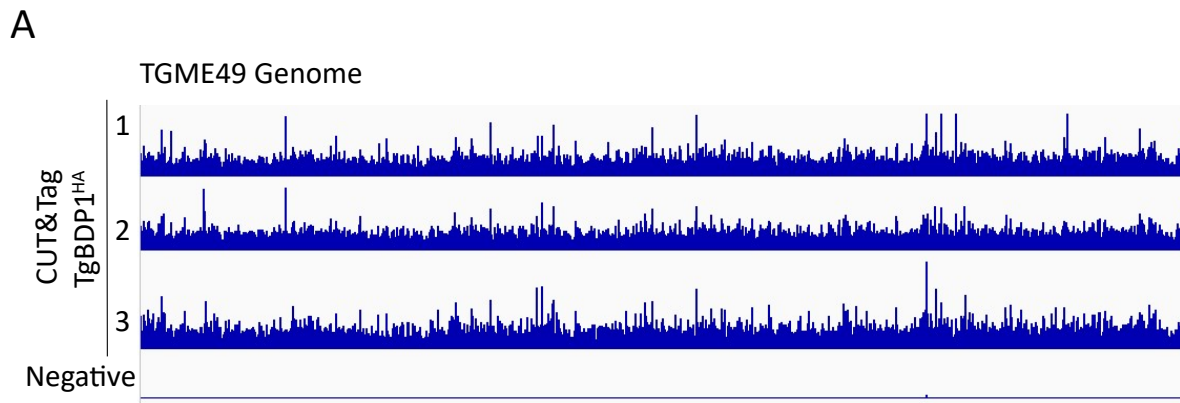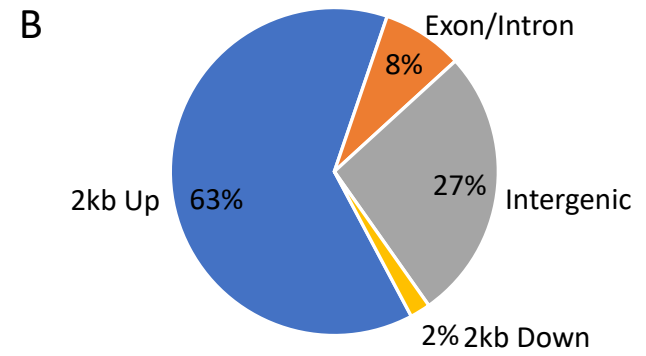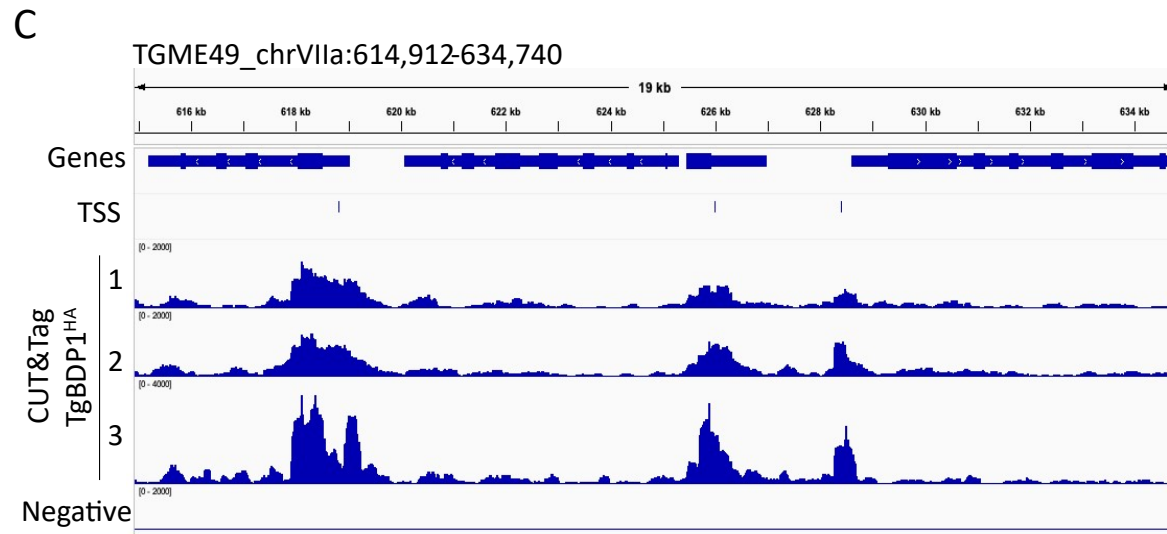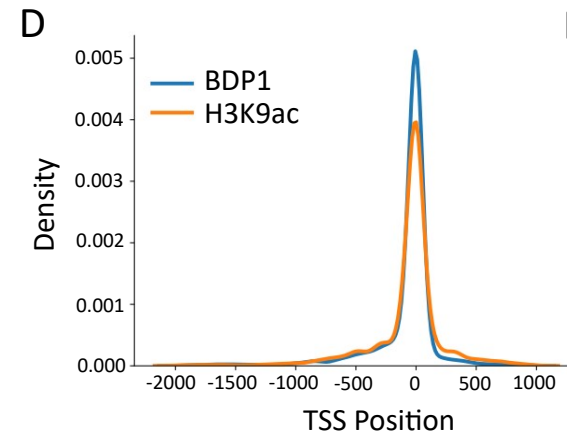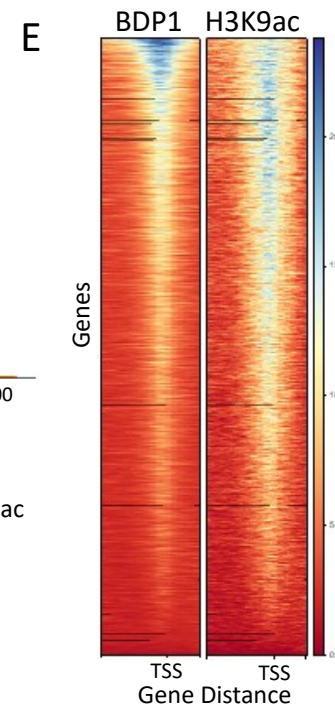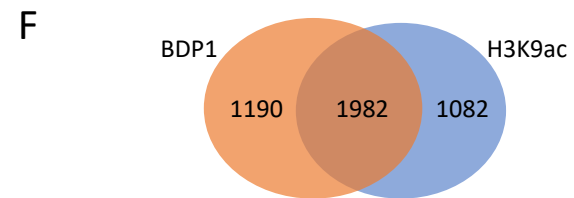

Figure 5

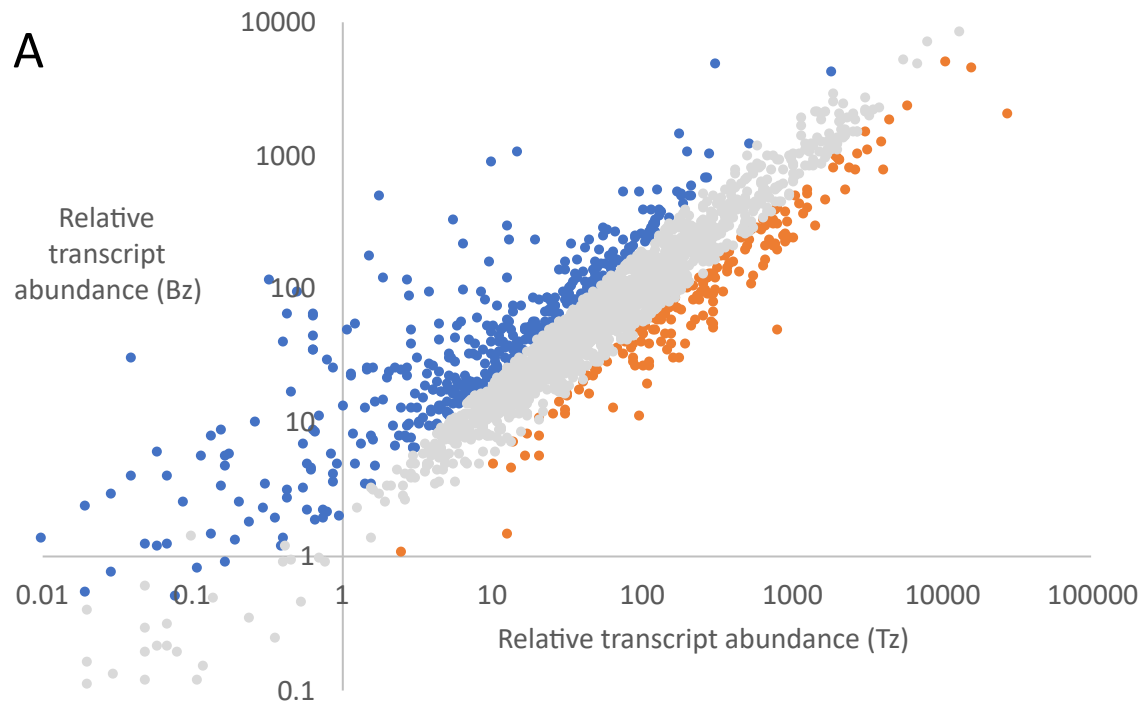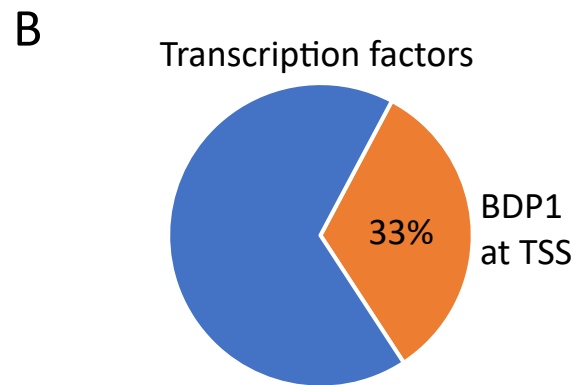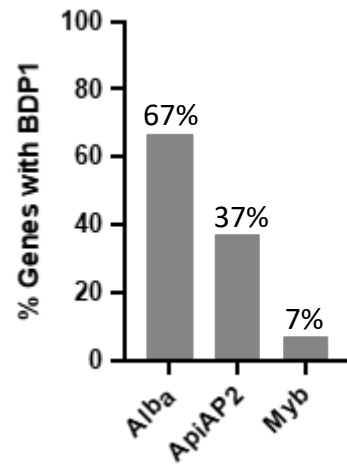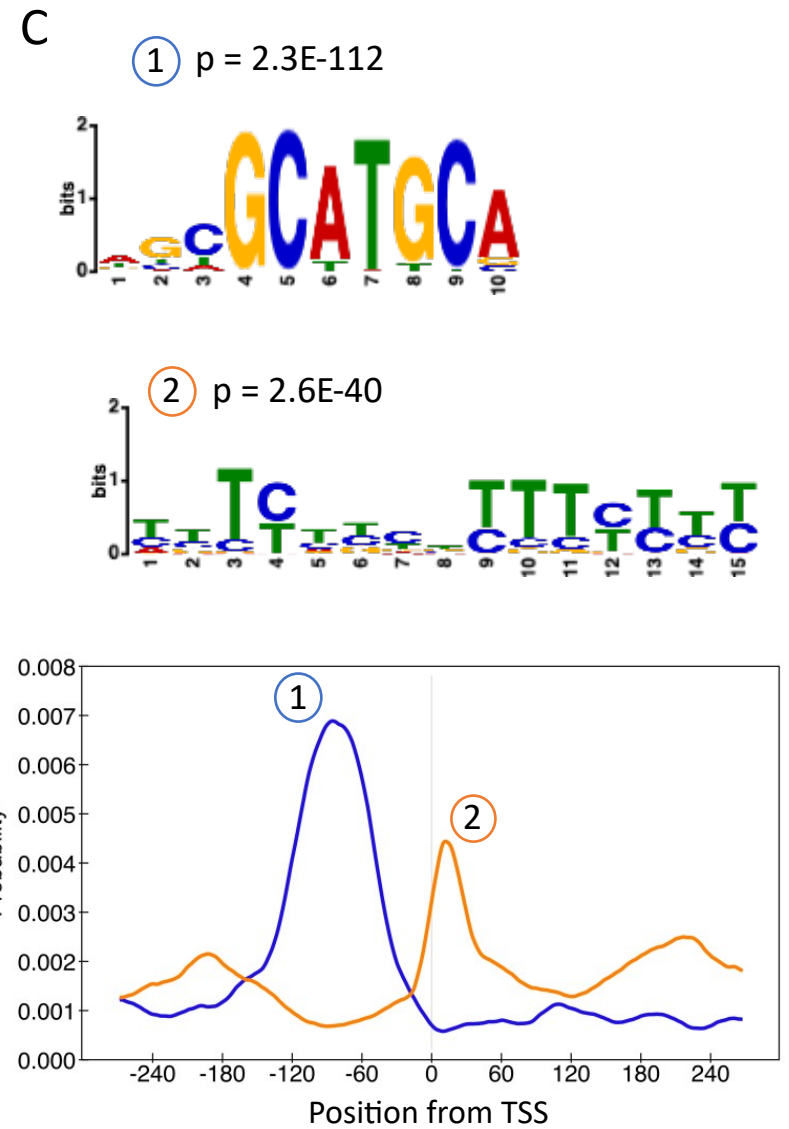

Figure 6

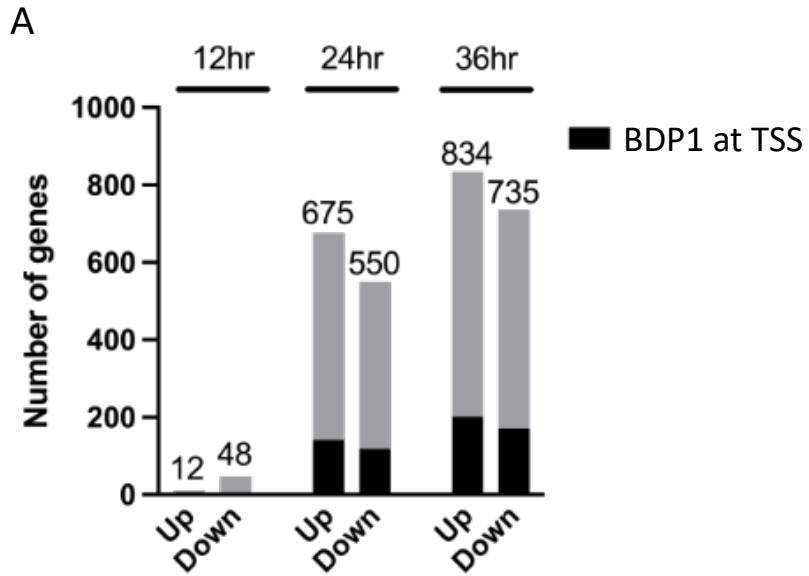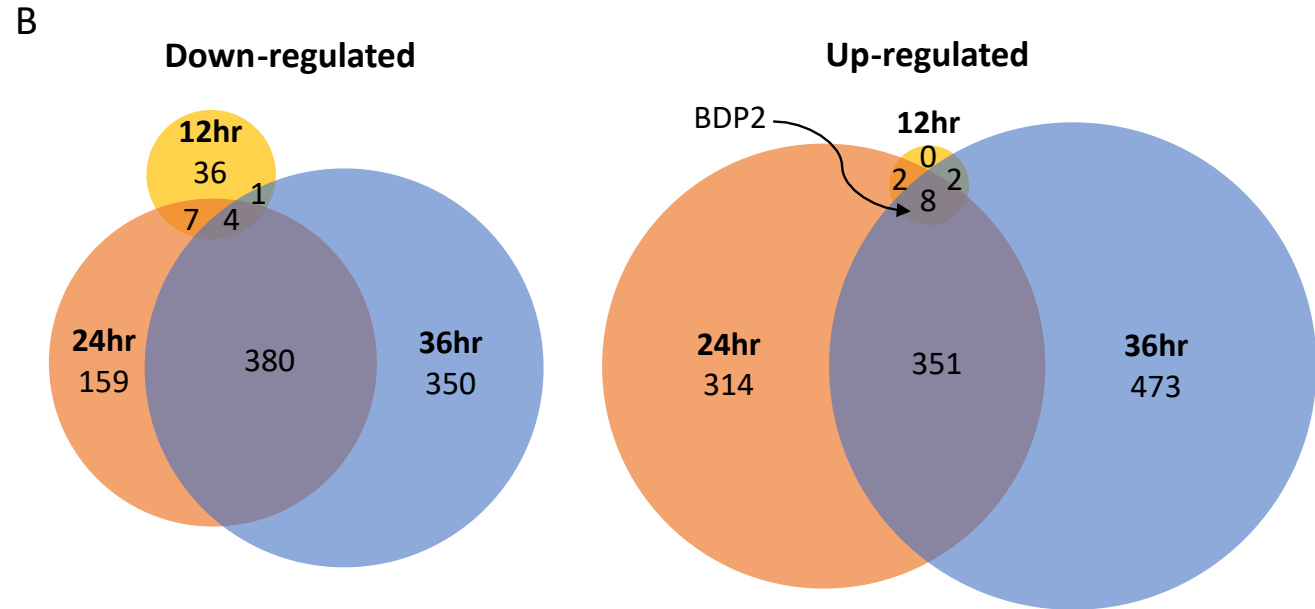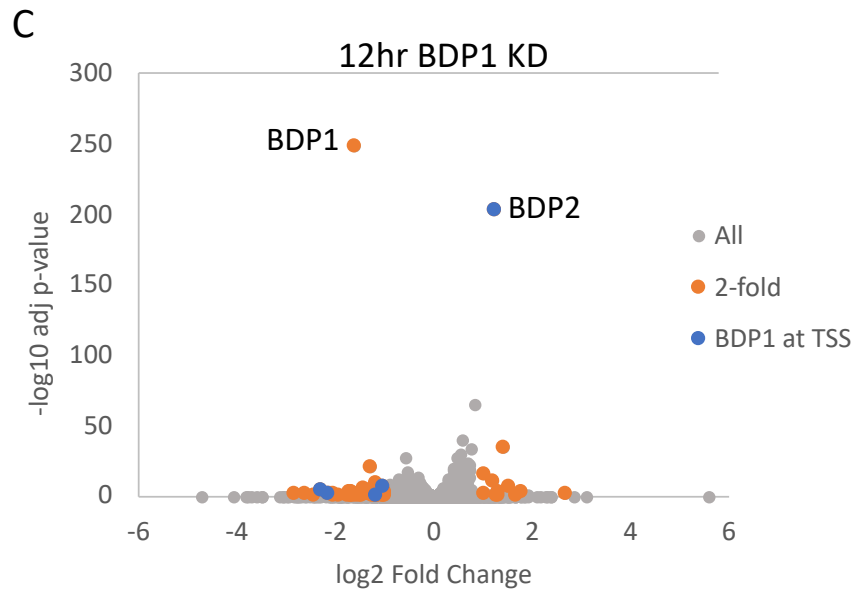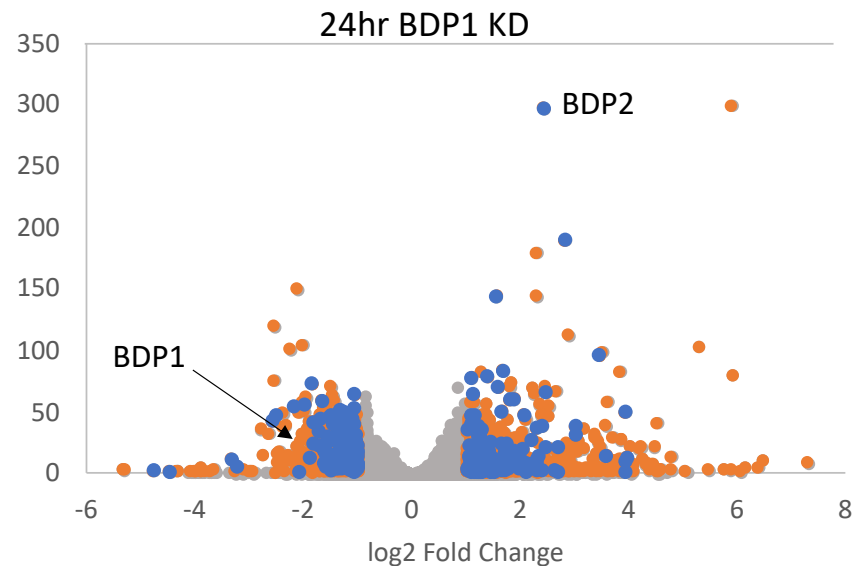

| Down       | BDP1 at TSS |
|------------|-------------|
| AP2XII-6   | No          |
| AP2XII-2   | Yes         |
| AP2XI-1    | Yes         |
| Up         | BDP1 at TSS |
| AP2IX-9    | Yes         |
| Myb 275480 | No          |
| Myb 211010 | No          |

Figure 7



A

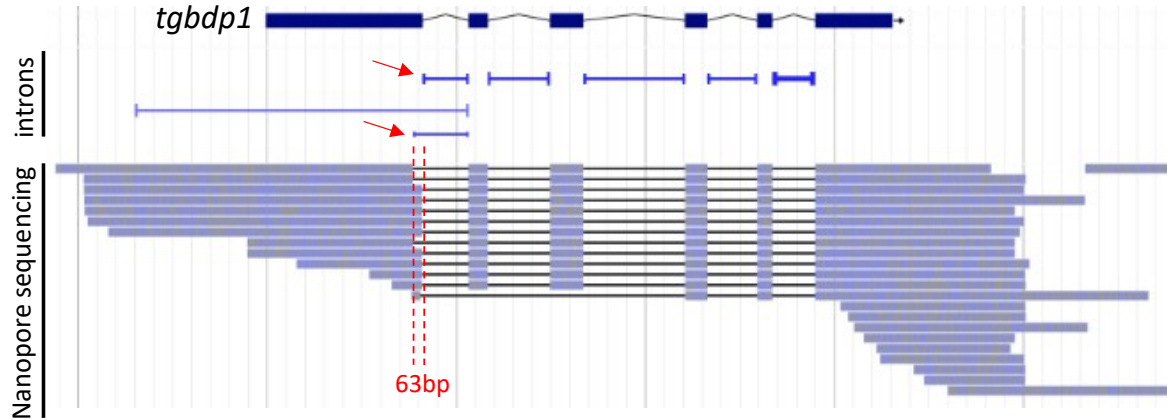

B

MSTGASVDAGGSGASASPGVSGASPVASPGVSASPRVSGASPVSSLPGASLAVSPFVPLFRIARHEPVSAVKEAFDKTLEKH  
 RREVAEQNPGVSEADLDALQMKQIQEQHLLVDPTSRGTLLEVAQRAKDEEAVLAQFLVDDKRVLAVTQRDRMQQTCLF  
 YAAREGHVALCRFFIERGCDPNAQDTVGTCLFYASREGRAACIAEILDRGPNPLIDINRQSCLFYAARDNRLDAVRVLEK  
 GADPQVKDTLRKTAWHFAKANNHVAVCALLKGAGGAGAQAAAAGVGAQGVRTGPSLPGRTCSISSLSFSGAAPASPNA  
 GAETPEALDGARAVGPGRTASGVHGEAVCVVEVPQRKKYRLQFRPLPEDCPDLWLNAENEKLTFFERLFPALSVMVRRRESQ  
 MGC GEGVSAESSQNHYDAIHSALLQNSQQAALGAGSFDLLGLWQSAASALLSELSKYEGGHIFEKVPDPKTPAGYYDVVT  
 RPMSLSCIKAKIKKSDYTHPQQFLKDVQVFINCEIYNQGSVWWSIGKNMQKFFTNQVMITRDYVDKYDKIYSVLAECE  
 EENRRAKASAERNSSAGEENERGPGAGPGERSETTAETGAAELRSGSSDRESGEETGNTKGEKDASSAETGESPEGPGEVKS  
 EDGARREGDPLPTAKAEEREWTEEQEAGAAKKEEESANGQAAVGGKEGRKRRRDNGESRGA

- ankyrin repeats
- bromodomain
- Sequence missing in isoform

C

|        |                                                            |
|--------|------------------------------------------------------------|
| clone1 | CGGCGCGGCCAGCCTCGCCCAACGCAGGTGCGGAGACACCTGAGGCTCTCGATGGCGC |
| clone2 | CGGCGCGGCCAGCCTCGCCCAACGCAGGTGCGGAGACACCTGAGGCTCTCGATGGCGC |
| clone3 | CGGCGCGGCCAGCCTCGCCCAACGCAGGTGCGGAGACACCTGAGGCTCTCGATGGCGC |
| clone4 | CGGCGCGGCCAGCCTCGCCCAACGCAG-----                           |
| clone5 | CGGCGCGGCCAGCCTCGCCCAACGCAG-----                           |
| clone6 | CGGCGCGGCCAGCCTCGCCCAACGCAG-----                           |
|        | *****                                                      |
| clone1 | TCGCGCTGTCGGACCTGGAAGAAGTGCCTCAGGCGTCCACGGCGAGGCCGTTT      |
| clone2 | TCGCGCTGTCGGACCTGGAAGAAGTGCCTCAGGCGTCCACGGCGAGGCCGTTT      |
| clone3 | TCGCGCTGTCGGACCTGGAAGAAGTGCCTCAGGCGTCCACGGCGAGGCCGTTT      |
| clone4 | -----GCGTCCACGGCGAGGCCGTTT                                 |
| clone5 | -----GCGTCCACGGCGAGGCCGTTT                                 |
| clone6 | -----GCGTCCACGGCGAGGCCGTTT                                 |
|        | *****                                                      |

D

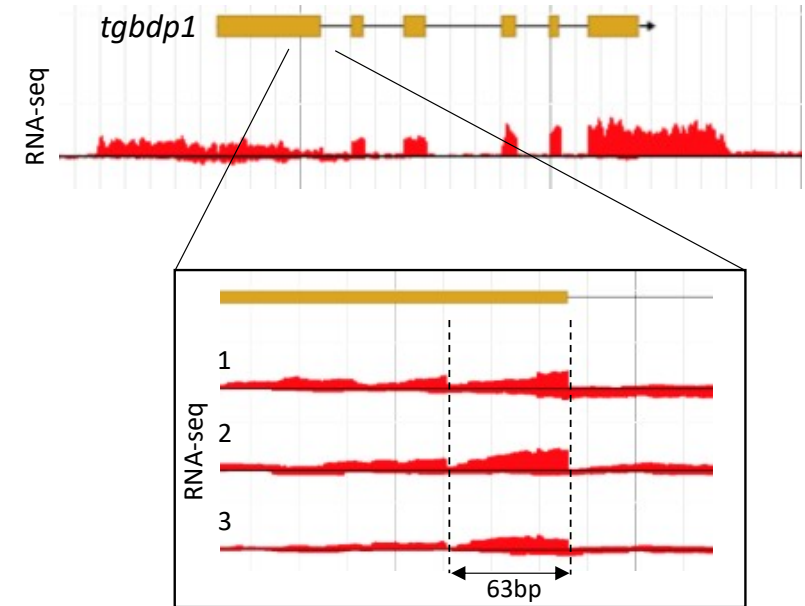

Supplemental Figure 1

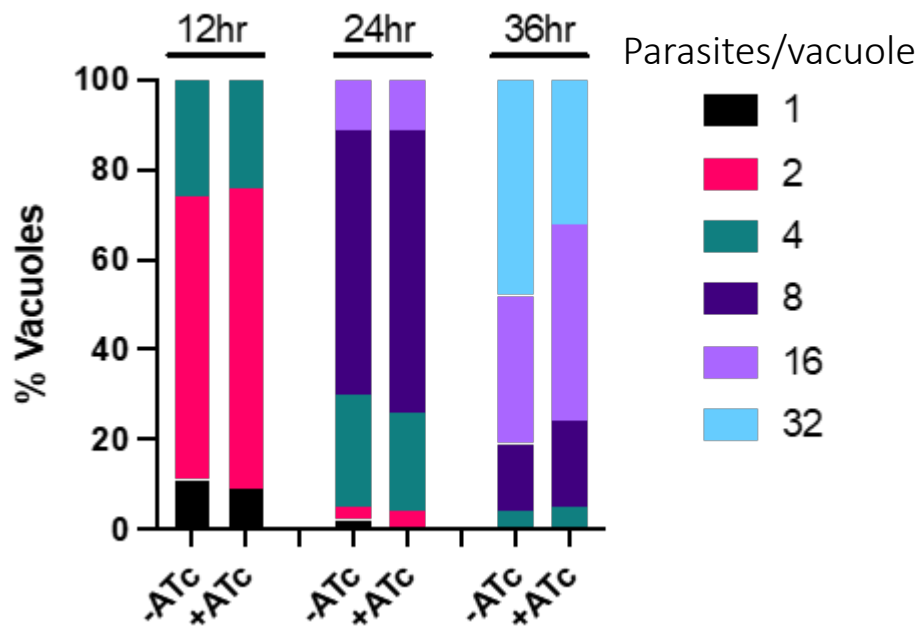

Supplemental Figure 2

Downregulated genes

bioRxiv preprint doi: <https://doi.org/10.1101/2022.12.24.521857>; this version posted December 24, 2022. The copyright holder for this preprint (which was not certified by peer review) is the author/funder, who has granted bioRxiv a license to display the preprint in perpetuity. It is made available under aCC-BY-NC-ND 4.0 International license.

Upregulated genes

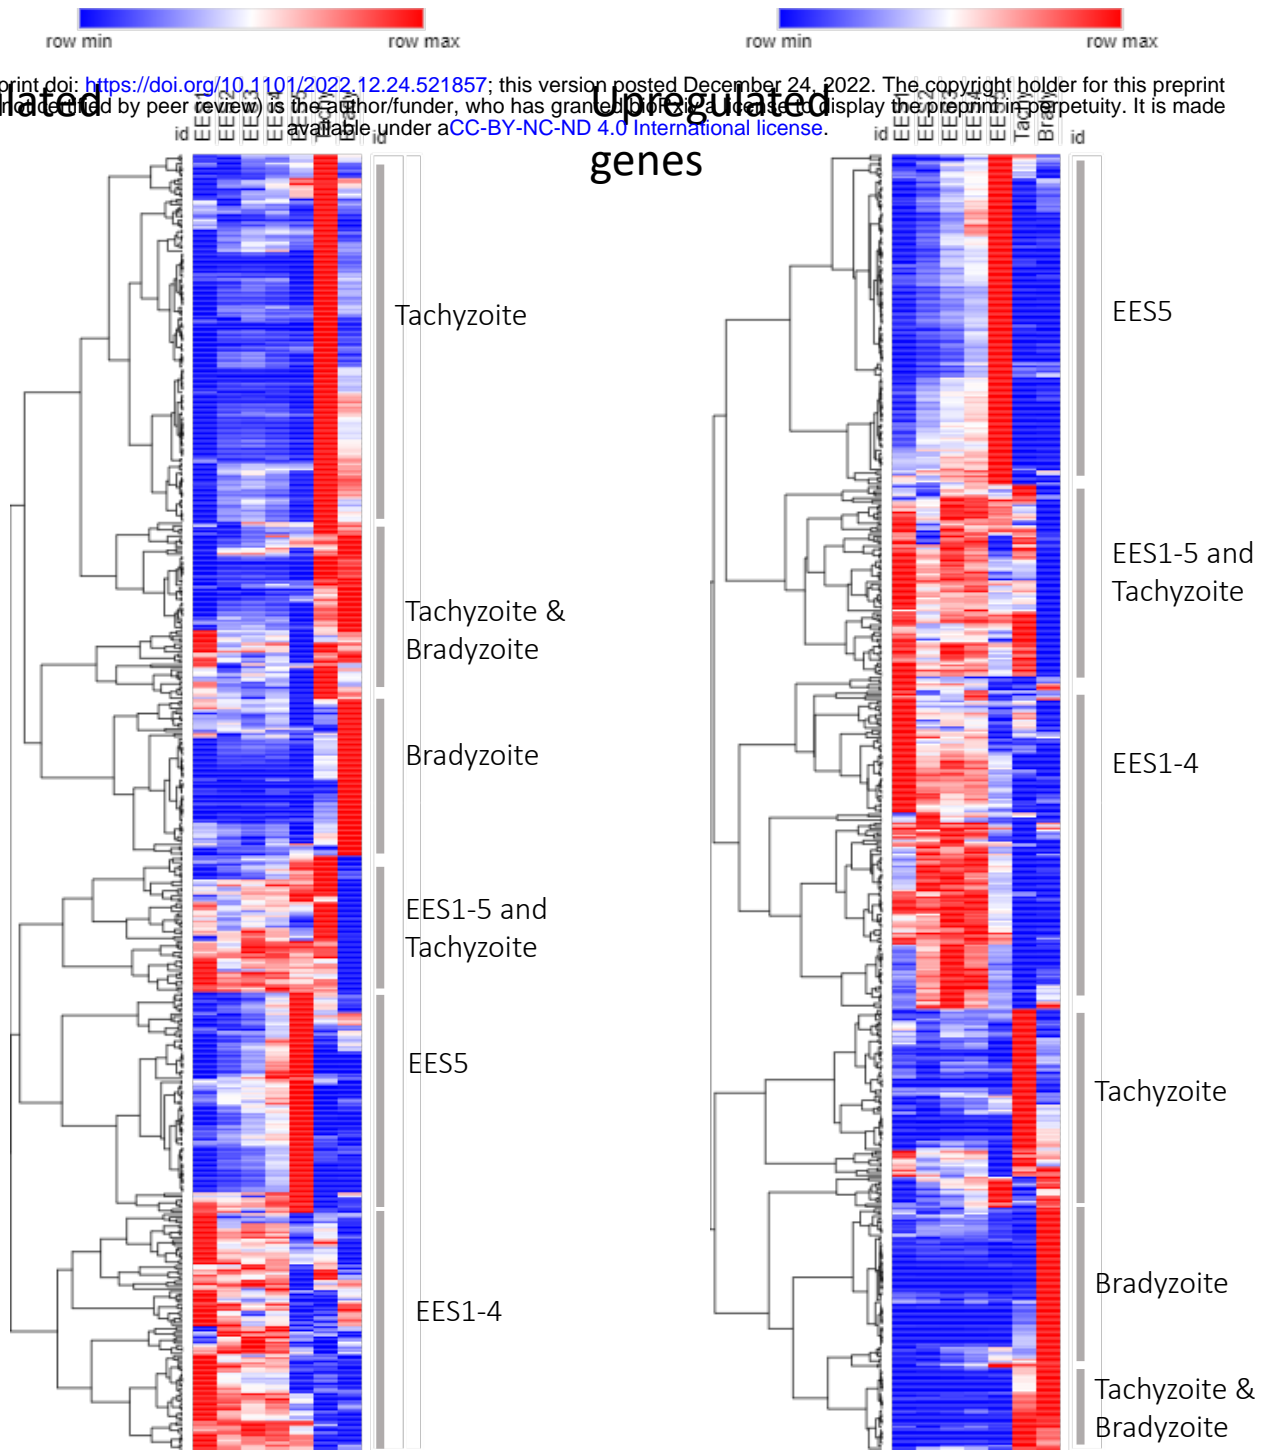

Supplemental Figure 3
